1 **Title**

2 Mechanical strain can increase segment number in live chick embryos

3

4 **Author list**

5 Ben K.A. Nelemans<sup>1\*</sup>, Manuel Schmitz<sup>1\*</sup>, Hannan Tahir<sup>1,2</sup>, Roeland M.H. Merks<sup>2,3</sup>, Theodoor  
6 H. Smit<sup>4,5</sup>

7

8 \* These authors contributed equally to this work.

9 Corresponding author is Theodoor H. Smit (email: t.h.smit@amc.nl)

10

11 **Affiliations**

12 1 Department of Orthopaedic Surgery, VU University Medical Center, Amsterdam Movement  
13 Sciences, Amsterdam, The Netherlands

14 2 Centrum Wiskunde & Informatica, Amsterdam, The Netherlands.

15 3 Mathematical Institute, Leiden University, Leiden, The Netherlands

16 4 Department of Medical Biology, Academic Medical Center, Amsterdam, The Netherlands

17 5 Amsterdam Movement Sciences Research Institute, The Netherlands

18 **Abstract**

19 Physical cues, experienced during early embryonic development, can influence species-  
20 specific vertebral numbers. Here we show that mechanical stretching of live chicken embryos  
21 can induce the formation of additional somites and thereby modify early segmental patterning.  
22 Stretching deforms the somites, and results in a cellular reorganization that forms stable  
23 daughter somites. Cells from the somite core thereby undergo mesenchymal-to-epithelial  
24 transitions (MET), thus meeting the geometrical demand for more border cells. Using a  
25 Cellular Potts Model, we suggest that this MET occurs through lateral induction by the  
26 existing epithelial cells. Our results indicate that self-organizing properties of the somitic  
27 mesoderm generate phenotypic plasticity that allows it to cope with variations in the  
28 mechanical environment. This plasticity may provide a novel mechanism for explaining how  
29 vertebral numbers in species may have increased during evolution. Additionally, by  
30 preventing the formation of transitional vertebrae, these self-organization qualities of somites  
31 may be selectively advantageous.

32

33 **Introduction**

34 A segmented spine is the characteristic feature of the vertebrate body plan, which provides  
35 mechanical support, flexibility, and protection of the spinal cord. Vertebral numbers vary  
36 considerably among species, ranging from six in frogs to several hundred in snakes  
37 (Richardson, Allen, Wright, Raynaud, & Hanken, 1998). The evolvability of the vertebral  
38 column allows vertebrates to adapt to diverse habitats and acquire matching locomotor styles  
39 by tuning the number of body segments (Galis et al., 2014a).

40

41 Patterning of the vertebrate body originates early in embryogenesis when the paraxial  
42 mesoderm on both sides of the midline segments into somites, which contain the predecessor

43 cells of vertebrae, ribs, muscles and skin. Somites are cell blocks in which a core of  
44 mesenchymal cells, the somitocoel, is surrounded by an epithelial layer (Kulesa, Schnell,  
45 Rudloff, Baker, & Maini, 2007; Martins et al., 2009); they also impose a segmented  
46 organization on the peripheral nervous system. The sequential partitioning of the paraxial  
47 mesoderm appears to be imposed by a molecular clock and a travelling wave of maturation  
48 created by a system of signalling gradients (Hubaud & Pourquié, 2014). This complex  
49 signalling network appears well conserved throughout the vertebrate phylum. The variation in  
50 somite numbers (and vertebral numbers) between species is presumably caused by mutations  
51 that lead to changes in the speed of the clock period or the elongation rate of the mesoderm,  
52 which both affect segmentation rate and somite size (Gomez et al., 2008; Gomez & Pourquie,  
53 2009; Herrgen et al., 2010).

54

55 Despite the intricately controlled network of the clock-and-wavefront mechanism, vertebral  
56 numbers in fish (Beacham & Murray, 1986; Hubbs, 1922; Tibblin, Berggren, Nordahl,  
57 Larsson, & Forsman, 2016), amphibians (Jockusch, 1997; Peabody & Brodie Jr., 1975),  
58 reptiles (Osgood, 1978), mammals (Lecyk, 1966) and birds (Lindsey & Moodie, 1967) may  
59 be influenced during early embryonic development by environmental cues such as  
60 temperature, salinity or light conditions. Mechanics may be another physical cue that induces  
61 different phenotypes of segmental patterning. In the framework of the Extended Evolutionary  
62 Synthesis, it has been argued according to the ‘side-effect hypothesis’, that morphological  
63 novelties in the body plan can result not only from genetic rearrangements, but also from  
64 mechanical cues exerted on self-organizing developing tissues (Laland et al., 2015; G. Müller,  
65 1990; G. B. Müller, 2003). Somitic mesoderm possesses a certain capacity for self-  
66 organization, as somite-like structures can form ectopically in the absence of a clock or a  
67 wavefront (Dias, de Almeida, Belmonte, Glazier, & Stern, 2014). The size of epithelializing

68 somites strongly correlates with embryonic growth (Tam, 1981), and hampering axial  
69 elongation of the embryo leads to disorganized somites (Stern & Bellairs, 1984). Somite  
70 formation also requires the contraction of cells in the PSM (Duess, Fujiwara, Corcionivoschi,  
71 Puri, & Thompson, 2013) and mechanical adhesion to the surrounding fibronectin matrix  
72 (Hubaud, Regev, Mahadevan, & Pourquié, 2017; Martins et al., 2009).

73

74 On the basis of these observations, we hypothesized that if somitic mesoderm is self-  
75 organizing under the influence of biomechanical cues, mechanical stretching may then suffice  
76 to induce morphological changes in the segmented vertebrate body plan.

77

78 To test this hypothesis, we developed a novel experimental setup to apply controlled strains to  
79 live chicken embryos. Time-lapse imaging confirmed that, given sufficient strain, mesodermal  
80 patterning can indeed be modulated (Fig S1). This suggests that mechanical cues can affect  
81 morphogenesis and may be an explanatory factor for variation in vertebral numbers in the  
82 scope of the ‘side-effect hypothesis’.

83

## 84 **Results**

85 To test the effect of mechanical stretching on somitogenesis, stage HH8-9 chick embryos  
86 (Hamburger & Hamilton, 1951) were cultured *ex ovo* in modified submerged filter paper  
87 sandwiches (Schmitz, Nelemans, & Smit, 2016) and stretched along their body axis twice for  
88 51 to 54 minutes at 1.2  $\mu\text{m/s}$  (Fig S1). As a result, the embryos experienced strain values of  
89  $23 \pm 3\%$  (average  $\pm$  SD) after the first pull and  $19 \pm 3\%$  after the second pull. Approximately  
90 12 hours after manipulation, the mesodermal segmentation of one third (19/57) of all  
91 stretched embryos was clearly disturbed, unlike that of control embryos (Fig 1A and B).  
92 Time-lapse microscopic imaging (Schmitz et al., 2016) revealed that somites budded off from

93 the PSM at regular intervals of  $79 \pm 8$  minutes in controls and  $80 \pm 6$  minutes in stretched  
94 samples. Stretched somites were more elongated than those in control embryos (Fig 1C-F,  
95 Movie S1 and Movie S2). These deformed somites then regularly divided into what we call  
96 “daughter somites”, and their morphology was consistent with somite divisions observed in  
97 N-cadherin and Cadherin-11 knockout mice (Horikawa, Radice, Takeichi, & Chisaka, 1999;  
98 Kimura et al., 1995). During daughter-somite formation, an invagination along the  
99 mediolateral plane of the deformed somites appeared simultaneously to their separation from  
100 the PSM (Fig 1F, Movie S2). It took several hours from the first appearance of this  
101 mediolateral invagination for the somite to divide completely. Somite division in stretched  
102 embryos appeared unilaterally or bilaterally, and often resulted in daughter somites of  
103 different sizes (Movie S2, Fig S4, Fig S5 and Fig S8).

104

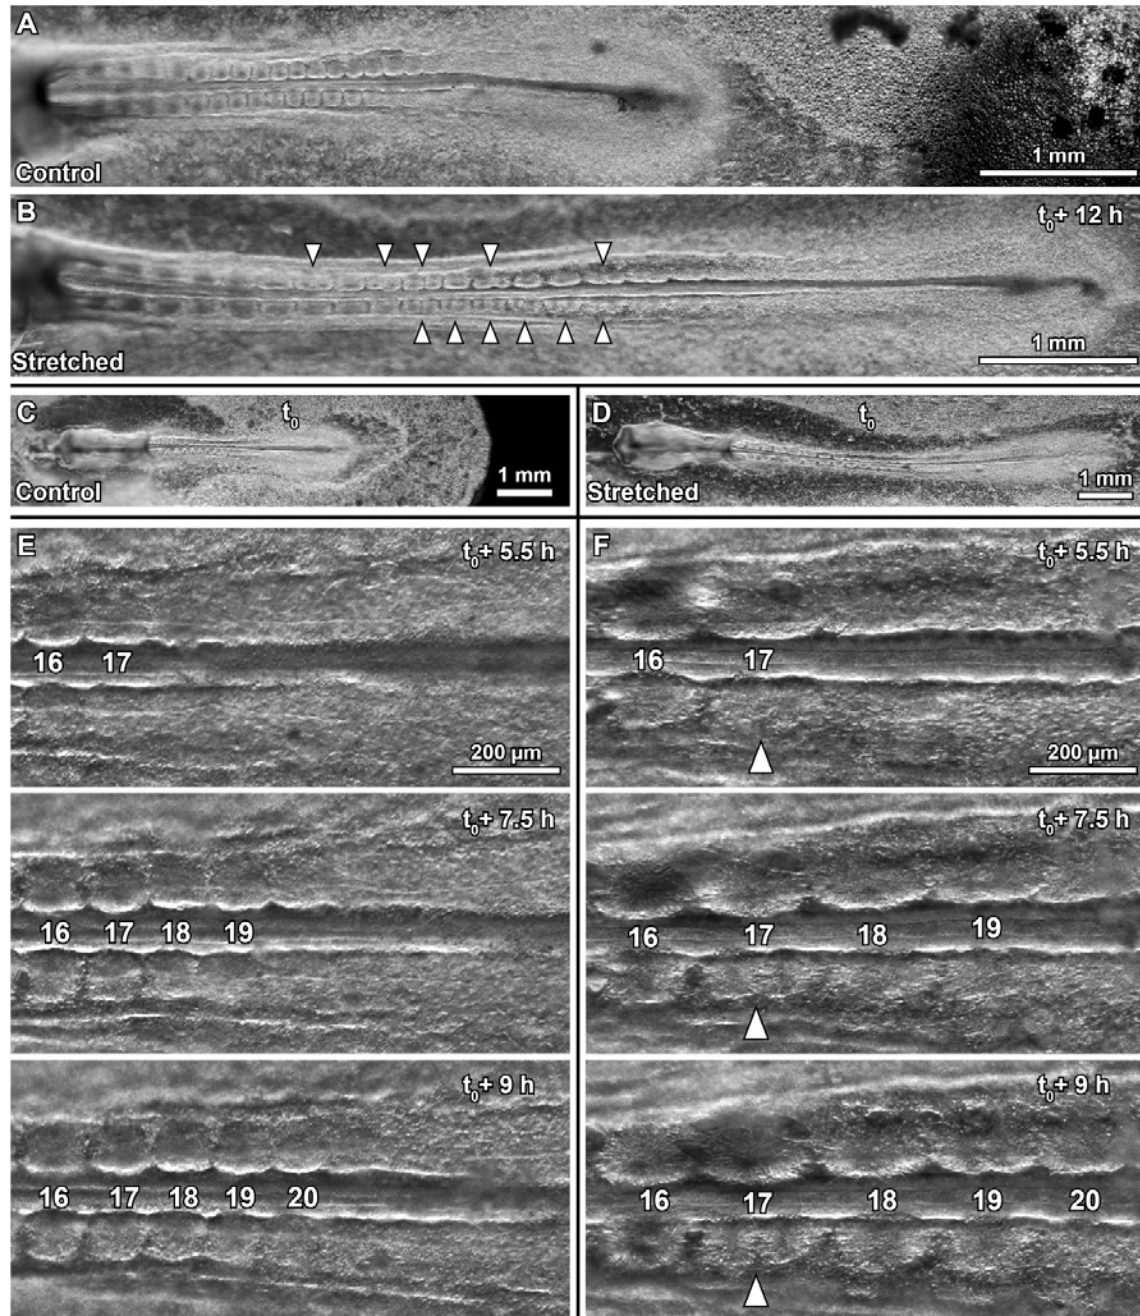

105

106 **Fig 1: Daughter somite formation in stretched chicken embryos.**

107 Dark-field microscopy images of age-matched (A) control and (B) stretched embryo. Anterior  
108 is to the left in all images, arrowheads indicate divided somites,  $t_0$  = end of stretch protocol,  
109 ventral view. Difference in axial length becomes obvious between control embryo (C) and  
110 stretched embryo (D) ( $t_0$ : both embryos are at the 13-somite stage). Selected time-lapse

111 frames of the segmenting PSM in control embryo (**E**) and stretched embryo (**F**). White  
112 arrowhead indicates daughter somite formation.

113

114 Daughter somites appeared as stable, rounded and clearly separated cellular spheres (Fig 1B).

115 They were morphologically similar to control somites, with epithelial cells organized radially

116 around a somitocoel of mesenchymal cells (compare Fig 2C and G). The daughter somites

117 were enclosed by a fibrous extracellular matrix (ECM) staining positively for fibronectin (Fig

118 S4). While somites in control embryos were rounded (Fig 2A), those in stretched embryos

119 were elongated, while any daughter somites were variable in size (Fig 2B, Fig S4 and Fig S5).

120 Small daughter somites consisting of a few epithelial cells only were also observed (Fig S4).

121 After fixation in transitional stages, the apical actin cortices of somites showed discontinuities

122 along their mediolateral plane, indicating openings of the epithelial sheet under influence of

123 the mechanical deformation (Fig 2D, E and Fig S6). At these locations, mesenchymal

124 somitocoel cells appeared elongated, presumably having undergone mesenchymal-to-

125 epithelial transitions (MET), and were integrated into the existing epithelium (Fig 2E and Fig

126 S6). Upon stretching, there was also strong ectopic expression of *EphA4* in the somitocoels

127 (Fig 2I); this was not present in control embryos (Fig 2H) and indicates stretch-induced MET.

128 During normal somitogenesis, cell-cell signalling between receptor EphA4 in the rostral part

129 of somite S-I and its ligand ephrin B2 in the caudal half of somite S0 has two effects: it

130 induces formation of the somite gap (Watanabe, Sato, Saito, Tadokoro, & Takahashi, 2009),

131 but also establishes epithelialization at somite boundaries by initiating a columnar

132 morphology and cell polarity via apical redistribution of  $\beta$ -catenin (Barrios et al., 2003).

133



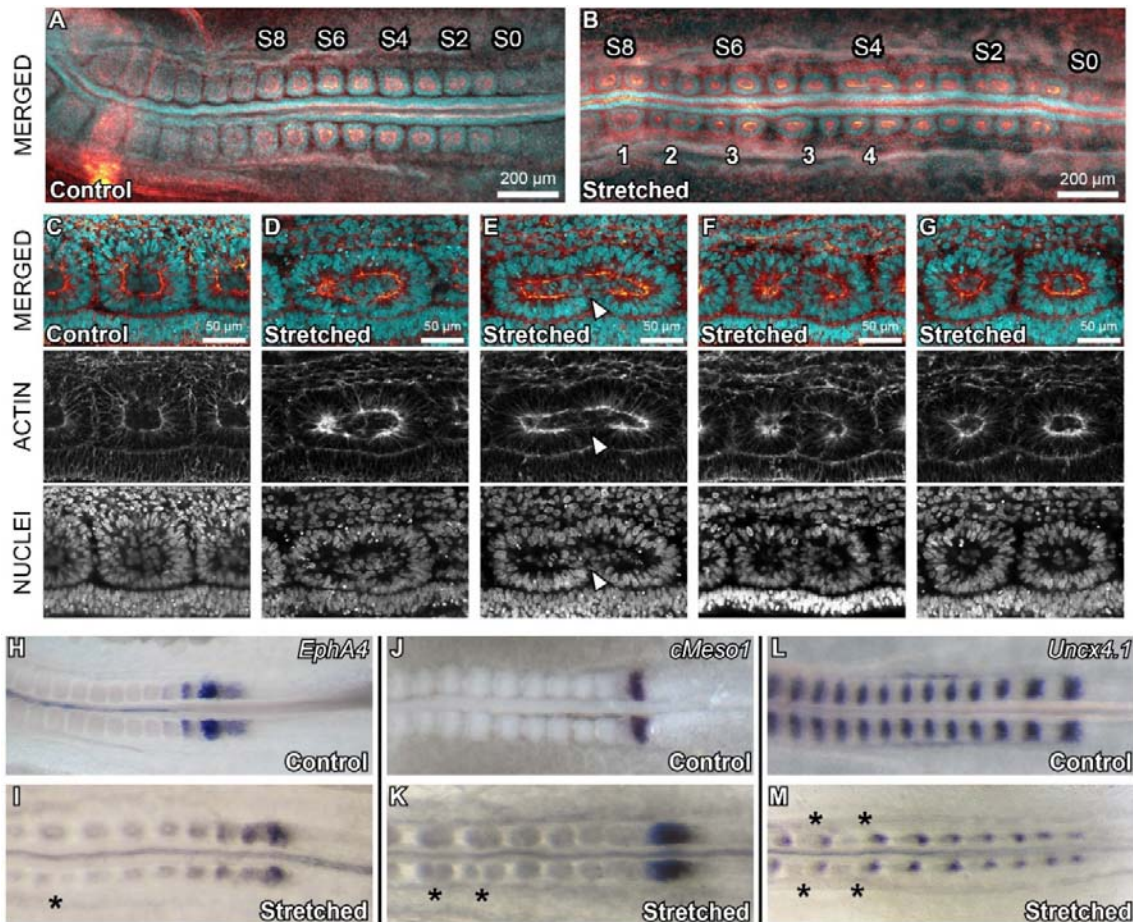

134  
135

**Fig 2: Immunohistochemistry and in situ hybridizations of stretched and control embryos.**

136

137 Control (A) and stretched embryo (B), anterior is left, somite numbers are indicated (Christ &  
138 Ordahl, 1995). Scale bars, 200  $\mu$ m. (B) Daughter somites can form unilaterally (1), equally  
139 (4) or unequally sized (3) and subdivide further (2). (C-G) Confocal cross-sections of selected  
140 somites of the same control (C) and stretched embryo (D-G). Anterior is left and medial  
141 below. Panels are arranged in potential order to illustrate the transition from a mechanically  
142 deformed somite (D) to two daughter somites (G). Cells from the somitocoel seem to gain an  
143 elongated morphology, possibly before incorporation into the epithelium (arrowhead in E).  
144 (H-M) *In situ* hybridizations for *EphA4*, *cMeso1* and *Uncx4.1* show that *EphA4* expression is  
145 induced around the somitocoels (I), while no new rostro-caudal polarity is induced in the  
146 daughter somites (indicated by \*).



147

148

149 However, the expression pattern for *cMesol*, the key initiator of somite rostro-caudal polarity  
150 in the unsegmented PSM in chicken (Morimoto et al., 2007), was not influenced by the  
151 stretching (Fig 2K), and the expression pattern of caudal somite marker *Uncx4.1* (Schrägle,  
152 Huang, Christ, & Pröls, 2004) showed that daughter somites did not gain a new rostro-caudal  
153 genetic identity (Fig 2M). Altogether, our data suggest that mechanical stretching did not  
154 affect the unsegmented PSM or the rostro-caudal polarization of the somites. However,  
155 mechanical stretching did lead to continuation of EphA4-mediated epithelialization of  
156 mesenchymal cells from the somitocoel in somites undergoing daughter-somite formation.

157

158 To identify the conditions under which mechanically deformed somites would successfully  
159 reorganize into daughter somites, we used the Cellular Potts model (CPM) and implemented a  
160 cell-based computer simulation with the open-source package CompuCell3D (Glazier &  
161 Graner, 1993; Swat et al., 2012). The somite consisted of a core of non-polarized  
162 mesenchymal cells surrounded by a layer of polarized, epithelial cells (Dias et al., 2014). We  
163 simulated a somite embedded within an elastic extracellular matrix (ECM; Fig 3A) and  
164 mimicked stretching by applying axial tension to the ECM (Fig 3B, Movie S3). To narrow  
165 down the possible mechanisms for somite reorganization under mechanical deformation, we  
166 tested different rules for cellular behaviour in the deformed somite (Fig S10).

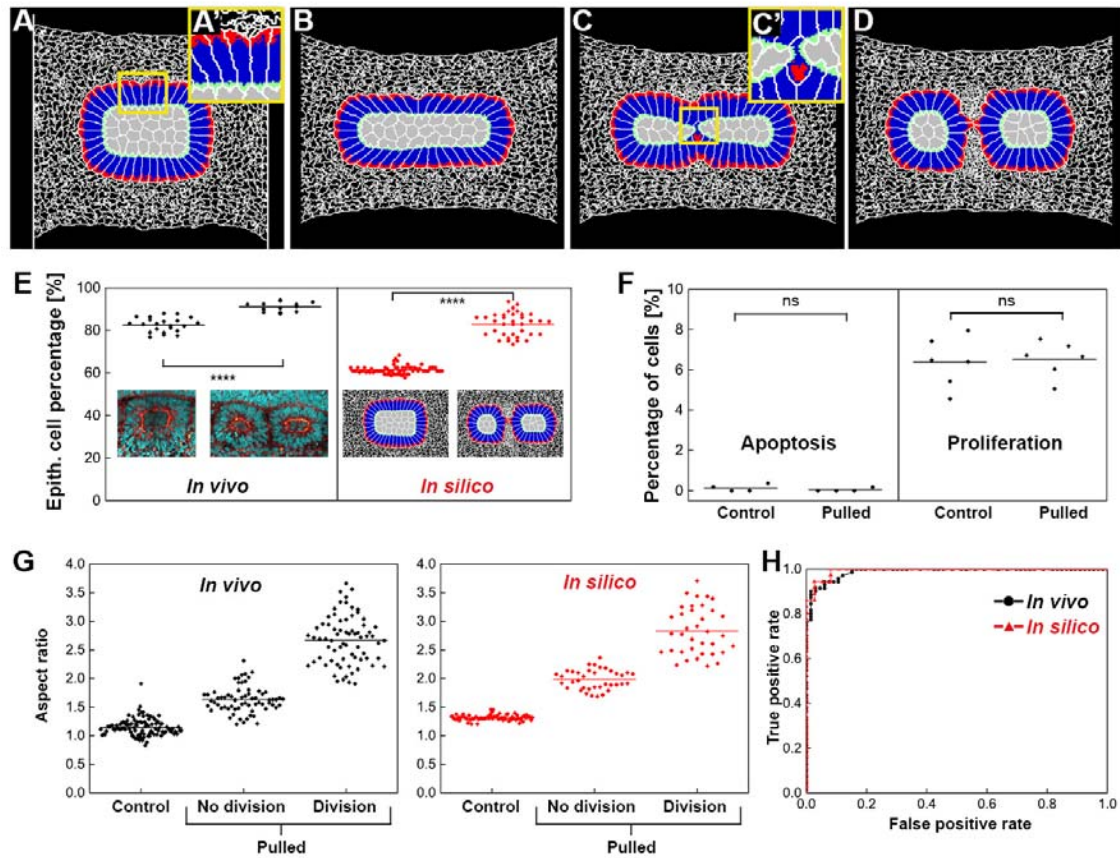

167

168 **Fig 3: Cellular Potts model of somite remodelling in comparison to daughter somite**  
 169 **formation in vivo.**

170 (A-D) Daughter somite formation *in silico*, induced by stretching. Mesenchymal cells (grey)  
 171 and extracellular matrix (white mesh), (A') epithelial cells consisting of apical (green), lateral  
 172 (blue) and basal (red) domains. (C') Somitocoel cells undergoing MET. (E) Percentages of  
 173 epithelial cells in control and divided somites *in silico* and *in vivo*, average line is shown.  
 174 Significant increase of epithelial cell fraction *in vivo* ( $P < 0.0001$ ) and *in silico* ( $P < 0.0001$ ). (F)  
 175 Apoptotic and proliferation rates in somitic mesoderm of control and stretched embryos.  
 176 Differences non-significant (Mann-Whitney test, apoptosis  $P = 0.43$ , proliferation  $P = 0.79$ ). (G)  
 177 Somite aspect ratios *in vivo* and *in silico*. Point clouds and average lines are given. (H) ROC  
 178 curves for daughter somite formation *in vivo* and *in silico*, in dependence of aspect ratio of

179 deformed somites. AUC is 0.989 (*in vivo*, 95% CI: 0.953-0.999) and 0.993 (*in silico*, 95% CI:  
180 0.938-1.000).

181

182 We found that daughter-somite formation *in silico* could successfully be induced only if MET  
183 was initiated when mesenchymal core cells came into contact with the basal or lateral  
184 membranes of epithelial cells (Fig 3C, C' and D). To validate this model prediction *in vivo*,  
185 we calculated the relative fraction of mesenchymal and epithelial cells in the equatorial cross-  
186 section of control somites and divided somites. This showed that the epithelial cell fraction  
187 was indeed significantly higher in daughter somites than in controls, and also matched the *in*  
188 *silico* prediction independent of the size of the initial somite (Fig 3E, Fig S11). As the  
189 stretching *in vivo* caused no significant changes in the apoptosis and proliferation rates (Fig  
190 3F), we conclude that the increase in the epithelial cell fraction was due to MET.

191

192 To determine the relationship between mechanical deformation and somite division, we  
193 compared the aspect ratios of stretched dividing somites (prior to division) and stretched non-  
194 dividing somites with those of control somites (Fig 3G, Fig S7). These measurements show  
195 that somite division is only possible beyond an aspect ratio threshold of about 2 *in vivo* or 2.5  
196 *in silico*. The corresponding receiver operating characteristics (ROC) curves (Goodenough,  
197 Rossmann, & Lusted, 1974; Hanley & McNeil, 1982; Lusted, 1971; Metz, 1978) show that  
198 the somite aspect ratio is indeed an excellent predictor of somite division *in vivo* and *in silico*,  
199 indicating that daughter-somite formation is a highly mechanically-determined process (Fig  
200 3H).

201

202 **Discussion**

203 We found that mechanical stretching of live chick embryos can induce a slow reorganization  
204 of somites to form two or more well-shaped and stable daughter somites. The complete  
205 division of a stretched somite into daughter somites took several hours, indicating that  
206 daughter-somite formation is an active process of tissue reorganization, rather than acute  
207 mechanical disruption. The resulting formation of new epithelial borders took place in the  
208 somitic mesoderm, *i.e.* outside the functional range of the molecular cues described in the  
209 clock-and-wavefront mechanism (Hubaud & Pourquié, 2014). Remarkably, the segmentation  
210 clock speed (estimated by the average somite formation time) and the genetic segmentation  
211 (A-P-polarity of the somites) stay robust during severe deformations imposed on the embryo.  
212 As the FGF/WNT gradients are intracellular by mRNA or protein inheritance (Dubrulle &  
213 Pourquié, 2004), the cells may retain their local information, despite their different spacing  
214 after stretching. Interestingly, our data show that the organization of forming somites is not  
215 final after their separation from the anterior tip of the PSM, but that somites can still adapt to  
216 their environment.

217

218 High-resolution confocal imaging indicates that, during daughter-somite formation, the  
219 demand for additional border cells is satisfied by the recruitment of mesenchymal cells from  
220 the somitocoel into the existing epithelium. The mechanical deformation creates  
221 discontinuities in the apical actin cortices of stretched somites. At the resulting interfaces,  
222 mesenchymal cells from the somite core undergo mesenchymal-epithelial transitions (MET)  
223 and get integrated into the somitic epithelium. Similarly, it has been shown previously that the  
224 development of normal somitic epithelia involves a continuous addition of cells from the  
225 somitocoel by accretion and egression (Martins et al., 2009). Our observations indicate that,  
226 by adding mesenchymal cells to the epithelium via a similar cellular behaviour during

227 stretching, the epithelium adapts to the changing environment. Under sufficient deformation,  
228 this can lead to daughter-somite formation.

229

230 We were able to model daughter-somite formation *in silico* only if MET was initiated when  
231 mesenchymal core cells came into contact with the basal or lateral membranes of epithelial  
232 cells. This suggests a contact-induced mechanism triggering MET of somitocoel cells during  
233 daughter-somite formation. *In vivo*, we observed ectopic expression of *EphA4* without  
234 *cMesol* expression in strained somites, although *EphA4* is thought to be downstream of  
235 *cMesol* (Watanabe et al., 2009). This indicates that *EphA4* expression in stretched somites is  
236 maintained or reinitiated, suggesting an additional mechanosensitive pathway that leads to  
237 *EphA4* upregulation during somite division that is independent from, or redundant to, *cMesol*.  
238 A contact-induced MET mechanism, as suggested here for daughter-somite formation, could  
239 underlie general epithelial self-organization during development and homeostasis of epithelia  
240 under mechanical stress (Jackson, Kim, Balakrishnan, Stuckenholz, & Davidson, 2017;  
241 Martins et al., 2009). This cell behaviour could be mediated via epithelial membrane-based  
242 signalling (Baum & Georgiou, 2011; Campbell, Casanova, & Skaer, n.d.), for example on the  
243 level of Eph and ephrin binding.

244

245 We show that chick somite formation is phenotypically plastic under changing biomechanical  
246 conditions. As the geometry of a somite in a stretched embryo predicts with remarkable  
247 reliability if it will reorganize into daughter somites or not, daughter-somite formation is  
248 highly mechanically determined. This supports the idea that, like temperature, light regime or  
249 salinity (Tibblin et al., 2016), mechanical forces can be an additional cue to the induction of  
250 different phenotypes of segmental patterning during embryonic development. To further  
251 explore the role of mechanical cues in inducing phenotypic plasticity of vertebral numbers, it



252 will be necessary to study the effect of modified mesodermal patterning in stretched embryos  
253 on later embryonic development. Though in principle possible (Nagai, Sezaki, Nakamura, &  
254 Sheng, 2014), transplanting stretched embryos back into a host egg could prove technically  
255 challenging due to the deformation of the embryos. It may therefore be more promising to  
256 transplant daughter somites into host chick embryos in the egg and see how skeletal  
257 patterning might be influenced.

258

259 It has been suggested that the wide range of vertebral numbers between vertebrate species  
260 could have evolved for two reasons: (1) The spatial dissociation between axis regionalisation  
261 via *Hox* gene expression and segmentation patterning, and (2) the evolvability of the  
262 segmentation clock's period and its relation to the axial growth of the developing embryo  
263 (Gomez et al., 2008; Gomez & Pourquie, 2009; Herrgen et al., 2010). However, if the  
264 phenotypic plasticity of somite formation shown in our experiments can indeed translate into  
265 different vertebral numbers in the later embryo, our findings could indicate an alternative  
266 route for vertebrate body plan evolution. Following the 'side-effect hypothesis' (G. B. Müller,  
267 2003), natural selection may act on body proportions, leading to changes in the geometry and  
268 mechanical loading of the somitic mesoderm. As an initial by-product, the phenotypic  
269 plasticity of somites that we show in our experiments then may lead to increasing somite  
270 numbers. Later, maintenance of a consistent alteration of the somite number over generations  
271 may then become consolidated at the genetic level by natural selection, i.e. via genetic  
272 assimilation (Braendle & Flatt, 2006; Fusco & Minelli, 2010), thus providing robustness to  
273 the development of the newly acquired body plan. A correlation between axial growth of the  
274 embryo and somite size has been shown in mice (Tam, 1981). While daughter-somite  
275 formation may be useful as a source of skeletal variation, it remains to be clarified whether

276 and how the developing embryo may cope with the missing A-P polarity of the stretch-  
277 induced daughter somites.

278

279 Daughter-somite formation could also help to explain an interesting phenomenon.  
280 Transitional vertebrae, i.e. vertebrae with morphological characteristic of two adjacent spinal  
281 regions (for example lumbar area and sacrum), result from incomplete homeotic shifts of axial  
282 identity defined by *Hox* gene expression. Generally, as more than one mutation is needed for  
283 complete transformations, incomplete homeotic transformations (and therefore transitional  
284 vertebrae) are frequent (Alkema, van der Lugt, Bobeldijk, Berns, & van Lohuizen, 1995;  
285 Charité, de Graaff, & Deschamps, 1995; Horan, Wu, Wolgemuth, & Behringer, 1994; Kostic  
286 & Capecchi, 1994; Li, Kawasumi, Zhao, Moisyadi, & Yang, 2010; Rancourt, Tsuzuki, &  
287 Capecchi, 1995; van den Akker et al., 2001; Varela-Lasheras et al., 2011). However, these  
288 transitional vertebrae are statistically underrepresented in several amniote species with  
289 variable trunk vertebrae numbers, including *Triturus* newts and lizards ((Kaliontzopoulou,  
290 Llorente, & Carretero, 2008; Slijepčević, Galis, Arntzen, & Ivanović, 2015), F. Galis,  
291 personal communication, October 2017). This suggests a developmental mechanism which  
292 favours complete numbers of trunk vertebrae over transitional vertebrae that might hamper  
293 mechanical function (Galis et al., 2014b; Slijepčević et al., 2015). Assuming that additional  
294 trunk somites form bilaterally via daughter-somite formation, both newly created somites  
295 would have the same axial identity as their mother somite, given that the *Hox* identity is  
296 determined mainly before the somite is formed, during the earliest stages of somite formation  
297 (Carapuço, Nóvoa, Bobola, & Mallo, 2005; Dubrulle, McGrew, & Pourquié, 2001; Mallo,  
298 Wellik, & Deschamps, 2010). This would generate vertebrae of similar regional identity with  
299 better mechanical performance than that of potentially disadvantageous transitional vertebrae  
300 with a different morphology (Galis et al., 2014a).

301

302 Somites' self-organizational properties provide a promising basis for further exploration into

303 the physical component of somite formation and the causal role of mechanics in body-plan

304 evolution.

305 **Materials and Methods**

306

307 *Embryo preparation and culture medium*

308 HH8-9 chicken embryos were explanted using filter paper carriers (Chapman, Collignon,  
309 Schoenwolf, & Lumsden, 2001) and cultured *ex ovo* as modified submerged filter paper  
310 sandwiches (Chapman et al., 2001; Schmitz et al., 2016), in Pannett-Compton (PC) saline  
311 (Pannett & Compton, 1924; Schmitz et al., 2016; Voiculescu, Papanayotou, & Stern, 2008),  
312 mixed with freshly harvested thin albumen in a 3:2 ratio. Silicone sheets protected embryos in  
313 culture from convection of the medium, thereby avoiding damage. Filter paper carriers were  
314 prepared as described recently (Schmitz et al., 2016). Additionally, four holes were cut out  
315 from corners of the carriers (Fig S1C) to hook the filter paper sandwiches onto the pins of the  
316 motorized arms of the stretching setup (Fig S1A).

317

318 *Stretching protocol, axial deformation and somite deformation*

319 Embryos were exposed to a standardized stretching protocol in a custom-made embryo  
320 stretcher (Fig S1C). In two consecutive stretching intervals, a slow displacement of the  
321 computer-controlled metal arm (see red arrow in Fig S1) extended the filter paper sandwiches  
322 by 3.7 to 3.95 mm at a speed of 1.2  $\mu\text{m/s}$ . At this speed, each stretch took 53 to 55 min. We  
323 calculated the mechanical strain for the first and the second stretching as relative length  
324 change compared to the axial length before stretching. Results are presented in S1 Table. The  
325 first stretch lead to  $23 \pm 3$  % strain (average and standard deviation over all 21 embryos  
326 presented in S1 Table). The second pull caused  $19 \pm 3$  % strain. For details on the embryo  
327 stretching, somite formation time and determination of somite deformation by aspect ratio,  
328 see SI Materials and Methods.

329

330

331 *Immunohistochemistry*

332 After the pulling experiments, the embryos and age-matched controls were fixed in 4%  
333 paraformaldehyde overnight in PBS at 4°C. Permeabilization in PBST + 0.15% Triton-X-100  
334 lasted for 1.5 hours. Blocking was performed for 2 hours in PBST + 2% BSA + 5% normal  
335 goat serum. The following antibody was used: fibronectin mouse-anti-chicken (B3/D6-s,  
336 Hybridoma bank). The antibody was diluted in PBST with 1% BSA. Embryos were incubated  
337 in primary antibody solution for 24h at 4°C, followed by extensive washing in PBS and  
338 incubation with appropriate Alexa Fluor-conjugated secondary antibody (1:500, Molecular  
339 Probes). Embryos were stained for F-actin using Alexa Fluor 546 Phalloidin (1:200,  
340 Molecular Probes) and for nucleic DNA using DAPI (1 µg/ml). Cell proliferation and  
341 apoptosis staining was performed using following antibodies: rabbit polyclonal anti-cleaved  
342 caspase-3 (1:200, Cell Signaling) and rabbit polyclonal anti-phosphohistone-H3 (1:400, Cell  
343 Signaling) with the appropriate Alexa Fluor-conjugated secondary antibodies (1:500,  
344 Invitrogen) and DAPI for nucleic DNA (1 µg/ml). For details on mesenchymal and epithelial  
345 cell counts, see SI Materials and Methods.

346

347 *In situ hybridizations*

348 In situ hybridizations were performed by standard procedures. Embryos were fixated in  
349 freshly prepared 4 % PFA in PBS. The embryos were pre-treated with proteinase-K in PBST  
350 at 37°C with agitation for 3 minutes. During staining, embryos were incubated in NTMT  
351 containing 4.5 µl NBT (75mg/ml in 70% DMF) and 3.5 µl BCIP (50mg/ml in 100% DMF)  
352 per 1.5 ml. Pulled embryos and age-matched controls were stained in the same wells for the  
353 same time, as much as possible. After the staining had been stopped, the embryos were



354 photographed in glycerol 80% in H<sub>2</sub>O with a Leica DFC320 camera on a Leica MZ75  
355 microscope.

356

357

### 358 *Cellular Potts model of somite division*

359 To understand the influence of mechanical stretching on somites and the somite division  
360 observed *in vivo*, we constructed a two-dimensional mathematical model based on the  
361 Cellular Potts Model (Glazier & Graner, 1993; Graner & Glazier, 1992), representing a cross-  
362 section through a three-dimensional somitic tissue. For the modelling details, see SI Materials  
363 and Methods.

364

### 365 **Acknowledgements**

366 We are grateful to Julio Belmonte for his advice on the simulations at the early stages of  
367 model development. We thank Stuart A. Newman and Frietson Galis for valuable comments  
368 during the final preparation of the manuscript.

369

### 370 **Competing interests**

371 The authors declare that there are no conflicts of interest.

372

### 373 **Author Contributions**

374 B.N. and M.S. performed the experiments and analysed the data. H.T. and R.M. performed  
375 the simulations. T.S. and R.M. supervised the project. All authors wrote the manuscript.

376

377 **References**

- 378 Alkema, M. J., van der Lugt, N. M., Bobeldijk, R. C., Berns, A., & van Lohuizen, M. (1995).  
379 Transformation of axial skeleton due to overexpression of bmi-1 in transgenic mice.  
380 *Nature*, 374(6524), 724–7. <https://doi.org/10.1038/374724a0>
- 381 Barrios, A., Poole, R. J., Durbin, L., Brennan, C., Holder, N., & Wilson, S. W. (2003). Eph /  
382 Ephrin Signaling Regulates the Mesenchymal- to-Epithelial Transition of the Paraxial  
383 Mesoderm during Somite Morphogenesis. *Current Biology*, 13, 1571–1582.  
384 <https://doi.org/10.1016/j>
- 385 Baum, B., & Georgiou, M. (2011). Dynamics of adherens junctions in epithelial  
386 establishment, maintenance, and remodeling. *Journal of Cell Biology*, 192(6), 907–917.  
387 <https://doi.org/10.1083/jcb.201009141>
- 388 Beacham, T. D., & Murray, C. B. (1986). The Effect of Spawning Time and Incubation  
389 Temperature on Meristic Variation in Chum Salmon *Oncorhynchus-Keta*. *Canadian*  
390 *Journal of Zoology*, 64(1), 45–48.
- 391 Braendle, C., & Flatt, T. (2006). A role for genetic accommodation in evolution? *BioEssays*.  
392 <https://doi.org/10.1002/bies.20456>
- 393 Campbell, K., Casanova, J., & Skaer, H. (n.d.). Mesenchymal-to-epithelial transition of  
394 intercalating cells in *Drosophila* renal tubules depends on polarity cues from epithelial  
395 neighbours. *Mechanisms of Development*, 127(7–8), 345–57.  
396 <https://doi.org/10.1016/j.mod.2010.04.002>
- 397 Carapuço, M., Nóvoa, A., Bobola, N., & Mallo, M. (2005). Hox genes specify vertebral types  
398 in the presomitic mesoderm. *Genes and Development*, 19(18), 2116–2121.  
399 <https://doi.org/10.1101/gad.338705>
- 400 Chal, J., Guillot, C., & Pourquié, O. (2016). PAPC couples the Segmentation Clock to somite  
401 morphogenesis by regulating N-cadherin dependent adhesion. *bioRxiv*.

- 402 <https://doi.org/10.1101/071084>
- 403 Chapman, S. C., Collignon, J., Schoenwolf, G. C., & Lumsden, A. (2001). Improved method  
404 for chick whole-embryo culture using a filter paper carrier. *Developmental Dynamics*,  
405 220(3), 284–289. [https://doi.org/10.1002/1097-0177\(20010301\)220:3<284::AID-  
406 DVDY1102>3.0.CO;2-5](https://doi.org/10.1002/1097-0177(20010301)220:3<284::AID-DVDY1102>3.0.CO;2-5)
- 407 Charité, J., de Graaff, W., & Deschamps, J. (1995). Specification of multiple vertebral  
408 identities by ectopically expressed Hoxb-8. *Developmental Dynamics*: An Official  
409 Publication of the American Association of Anatomists, 204(1), 13–21.  
410 <https://doi.org/10.1002/aja.1002040103>
- 411 Christ, B., & Ordahl, C. P. (1995). Early stages of chick somite development. *Anatomy and*  
412 *Embryology*, 191(5), 381–396. Retrieved from  
413 <http://www.ncbi.nlm.nih.gov/pubmed/7625610>
- 414 Dias, A. S., de Almeida, I., Belmonte, J. M., Glazier, J. A., & Stern, C. D. (2014). Somites  
415 Without a Clock. *Science*, 343(6172), 791–795. <https://doi.org/10.1126/science.1247575>
- 416 Dubrulle, J., McGrew, M. J., & Pourquié, O. (2001). FGF signaling controls somite boundary  
417 position and regulates segmentation clock control of spatiotemporal Hox gene activation.  
418 *Cell*, 106(2), 219–232. [https://doi.org/10.1016/S0092-8674\(01\)00437-8](https://doi.org/10.1016/S0092-8674(01)00437-8)
- 419 Dubrulle, J., & Pourquié, O. (2004). fgf8 mRNA decay establishes a gradient that couples  
420 axial elongation to patterning in the vertebrate embryo. *Nature*, 427(6973), 419–22.  
421 <https://doi.org/10.1038/nature02216>
- 422 Dues, J. W., Fujiwara, N., Corcionivoschi, N., Puri, P., & Thompson, J. (2013). ROCK  
423 inhibitor (Y-27632) disrupts somitogenesis in chick embryos. *Pediatric Surgery*  
424 *International*, 29(1), 13–8. <https://doi.org/10.1007/s00383-012-3202-7>
- 425 Fusco, G., & Minelli, A. (2010). Phenotypic plasticity in development and evolution: facts  
426 and concepts. *Philosophical Transactions of the Royal Society B: Biological Sciences*,

- 427 365(1540), 547–556. <https://doi.org/10.1098/rstb.2009.0267>
- 428 Galis, F., Carrier, D. R., van Alphen, J., van der Mije, S. D., Van Dooren, T. J. M., Metz, J. A.  
429 J., & ten Broek, C. M. A. (2014a). Fast running restricts evolutionary change of the  
430 vertebral column in mammals. *Proceedings of the National Academy of Sciences*,  
431 111(31), 11401–11406. <https://doi.org/10.1073/pnas.1401392111>
- 432 Galis, F., Carrier, D. R., van Alphen, J., van der Mije, S. D., Van Dooren, T. J. M., Metz, J. A.  
433 J., & ten Broek, C. M. A. (2014b). Fast running restricts evolutionary change of the  
434 vertebral column in mammals. *Proceedings of the National Academy of Sciences*,  
435 111(31), 11401–11406. <https://doi.org/10.1073/pnas.1401392111>
- 436 Glazier, & Graner. (1993). Simulation of the differential adhesion driven rearrangement of  
437 biological cells. *Physical Review. E, Statistical Physics, Plasmas, Fluids, and Related*  
438 *Interdisciplinary Topics*, 47(3), 2128–2154. Retrieved from  
439 <http://www.ncbi.nlm.nih.gov/pubmed/9960234>
- 440 Gomez, C., Ozbudak, E. M., Wunderlich, J., Baumann, D., Lewis, J., & Pourquié, O. (2008).  
441 Control of segment number in vertebrate embryos. *Nature*, 454(7202), 335–339.  
442 <https://doi.org/10.1038/nature07020>
- 443 Gomez, C., & Pourquie, O. (2009). Developmental control of segment numbers in vertebrates.  
444 *Journal of Experimental Zoology Part B: Molecular and Developmental Evolution*,  
445 312(6), 533–544. <https://doi.org/10.1002/jez.b.21305>
- 446 Goodenough, D. J., Rossmann, K., & Lusted, L. B. (1974). Radiographic applications of  
447 receiver operating characteristic (ROC) curves. *Radiology*, 110(1), 89–95.  
448 <https://doi.org/10.1148/110.1.89>
- 449 Graner, F., & Glazier, J. A. (1992). Simulation of Biological Cell Sorting Using a 2-  
450 Dimensional Extended Potts-Model. *Physical Review Letters*, 69(13), 2013–2016.  
451 <https://doi.org/10.1103/PhysRevLett.69.2013>

- 452 Hamburger, V., & Hamilton, H. L. (1951). A series of normal stages in the development of  
453 the chick embryo. *Journal of Morphology*, 88(1), 49–92.  
454 <https://doi.org/10.1002/jmor.1050880104>
- 455 Hanley, A. J., & McNeil, J. B. (1982). The Meaning and Use of the Area under a Receiver  
456 Operating Characteristic (ROC) Curve. *Radiology*, 143, 29–36.  
457 <https://doi.org/10.1148/radiology.143.1.7063747>
- 458 Herrgen, L., Ares, S., Morelli, L. G., Schröter, C., Jülicher, F., & Oates, A. C. (2010).  
459 Segment Number and Axial Identity in a Segmentation Clock Period Mutant. *Current*  
460 *Biology*, 20(14), 1254–1258. <https://doi.org/10.1016/j.cub.2010.05.071>
- 461 Horan, G. S., Wu, K., Wolgemuth, D. J., & Behringer, R. R. (1994). Homeotic transformation  
462 of cervical vertebrae in Hoxa-4 mutant mice. *Proceedings of the National Academy of*  
463 *Sciences of the United States of America*, 91(26), 12644–8. Retrieved from  
464 <http://www.ncbi.nlm.nih.gov/pubmed/7809093>
- 465 Horikawa, K., Radice, G., Takeichi, M., & Chisaka, O. (1999). Adhesive Subdivisions  
466 Intrinsic to the Epithelial Somites. *In Situ*, 215, 182–189.  
467 <https://doi.org/10.1006/dbio.1999.9463>
- 468 Hubaud, A., & Pourquié, O. (2014). Signalling dynamics in vertebrate segmentation. *Nature*  
469 *Reviews Molecular Cell Biology*, 15(11), 709–721. <https://doi.org/10.1038/nrm3891>
- 470 Hubaud, A., Regev, I., Mahadevan, L., & Pourquié, O. (2017). Excitable Dynamics and Yap-  
471 Dependent Mechanical Cues Drive the Segmentation Clock. *Cell*.  
472 <https://doi.org/10.1016/j.cell.2017.08.043>
- 473 Hubbs, C. L. (1922). Variations in the Number of Vertebrae and Other Meristic Characters of  
474 Fishes Correlated with the Temperature of Water during Development. *The American*  
475 *Naturalist*, 56(645), 360. <https://doi.org/10.1086/279875>
- 476 Jackson, T. R., Kim, H. Y., Balakrishnan, U. L., Stuckenholz, C., & Davidson, L. A. (2017).



- 477 Spatiotemporally Controlled Mechanical Cues Drive Progenitor Mesenchymal-to-  
478 Epithelial Transition Enabling Proper Heart Formation and Function. *Current Biology*:  
479 *CB*, 27(9), 1326–1335. <https://doi.org/10.1016/j.cub.2017.03.065>
- 480 Jockusch, E. L. (1997). Geographic variation and phenotypic plasticity of number of trunk  
481 vertebrae in Slender Salamanders, *Batrachoseps* (Caudata: Plethodontidae). *Evolution*,  
482 51(6), 1966–1982. <https://doi.org/10.2307/2411017>
- 483 Kaliontzopoulou, A., Llorente, G., & Carretero, M. (2008). Interspecific and intersexual  
484 variation in presacral vertebrae number in *Podarcis bocagei* and *P. carbonelli*. *Amphibia-*  
485 *Reptilia*, 29(2), 288–292. <https://doi.org/10.1163/156853808784125018>
- 486 Kimura, Y., Matsunami, H., Inoue, T., Shimamura, K., Uchida, N., Ueno, T., ... Takeichi, M.  
487 (1995). Cadherin-11 expressed in association with mesenchymal morphogenesis in the  
488 head, somite, and limb bud of early mouse embryos. *Developmental Biology*.  
489 <https://doi.org/10.1006/dbio.1995.1149>
- 490 Kostic, D., & Capecchi, M. R. (1994). Targeted disruptions of the murine *Hoxa-4* and *Hoxa-6*  
491 genes result in homeotic transformations of components of the vertebral column.  
492 *Mechanisms of Development*, 46(3), 231–47. Retrieved from  
493 <http://www.ncbi.nlm.nih.gov/pubmed/7918106>
- 494 Kulesa, P. M., Schnell, S., Rudloff, S., Baker, R. E., & Maini, P. K. (2007). From segment to  
495 somite: Segmentation to epithelialization analyzed within quantitative frameworks.  
496 *Developmental Dynamics*, 236(May), 1392–1402. <https://doi.org/10.1002/dvdy.21199>
- 497 Laland, K. N., Uller, T., Feldman, M. W., Sterelny, K., Müller, G. B., Moczek, A., ... Odling-  
498 Smee, J. (2015). The extended evolutionary synthesis: its structure, assumptions and  
499 predictions. *Proceedings of the Royal Society B: Biological Sciences*, 282(1813),  
500 20151019. <https://doi.org/10.1098/rspb.2015.1019>
- 501 Lecyk, M. (1966). The effect of hyperthermia applied in the given stages of pregnancy on the

- 502 number and form of vertebrae in the offspring of white mice. *Experientia*, 22(4), 254–  
503 255. <https://doi.org/10.1007/BF01900945>
- 504 Li, Z., Kawasumi, M., Zhao, B., Moisyadi, S., & Yang, J. (2010). Transgenic over-expression  
505 of growth differentiation factor 11 propeptide in skeleton results in transformation of the  
506 seventh cervical vertebra into a thoracic vertebra. *Molecular Reproduction and  
507 Development*, 77(11), 990–7. <https://doi.org/10.1002/mrd.21252>
- 508 Lindsey, C. C., & Moodie, G. E. E. (1967). THE EFFECT OF INCUBATION  
509 TEMPERATURE ON VERTEBRAL COUNT IN THE CHICKEN. *Canadian Journal  
510 of Zoology*, 45(5), 891–892. <https://doi.org/10.1139/z67-099>
- 511 Lusted, L. B. (1971). Decision-making studies in patient management. *New England Journal  
512 of Medicine*, 284(8), 416–424. <https://doi.org/10.1056/nejm197102252840805>
- 513 Mallo, M., Wellik, D. M., & Deschamps, J. (2010). Hox genes and regional patterning of the  
514 vertebrate body plan. *Developmental Biology*.  
515 <https://doi.org/10.1016/j.ydbio.2010.04.024>
- 516 Marmottant, P., Mgharbel, A., Kafer, J., Audren, B., Rieu, J.-P., Vial, J.-C., ... Delanoe-  
517 Ayari, H. (2009). The role of fluctuations and stress on the effective viscosity of cell  
518 aggregates. *Proceedings of the National Academy of Sciences of the United States of  
519 America*, 106(41), 17271–17275. <https://doi.org/10.1073/pnas.0902085106>
- 520 Martins, G. G., Rifes, P., Amândio, R., Rodrigues, G., Palmeirim, I., & Thorsteinsdóttir, S.  
521 (2009). Dynamic 3D cell rearrangements guided by a fibronectin matrix underlie  
522 somitogenesis. *PloS One*, 4(10), e7429. <https://doi.org/10.1371/journal.pone.0007429>
- 523 Metz, C. E. (1978). Basic principles of ROC analysis. *Seminars in Nuclear Medicine*, 8(4),  
524 283–298. [https://doi.org/http://dx.doi.org/10.1016/S0001-2998\(78\)80014-2](https://doi.org/http://dx.doi.org/10.1016/S0001-2998(78)80014-2)
- 525 Morimoto, M., Sasaki, N., Oginuma, M., Kiso, M., Igarashi, K., Aizaki, K., ... Saga, Y.  
526 (2007). The negative regulation of Mesp2 by mouse Ripply2 is required to establish the

- 527        rostro-caudal patterning within a somite. *Development (Cambridge, England)*, 134(8),  
528        1561–9. <https://doi.org/10.1242/dev.000836>
- 529 Müller, G. (1990). The origin of evolutionary novelties: a side-effect hypothesis. In M. H.  
530        Nitecki & D. V. Nitecki (Eds.), *Evolutionary innovations* (pp. 99–130). Retrieved from  
531        <https://books.google.com/books?hl=en&lr=&id=2nUGkIXMR58C&pgis=1>
- 532 Müller, G. B. (2003). Embryonic motility: Environmental influences and evolutionary  
533        innovation. *Evolution and Development*, 5(1), 56–60. <https://doi.org/10.1046/j.1525->  
534        142X.2003.03009.x
- 535 Nagai, H., Sezaki, M., Nakamura, H., & Sheng, G. (2014). Extending the limits of avian  
536        embryo culture with the modified Cornish pasty and whole-embryo transplantation  
537        methods. *Methods*, 66(3), 441–446. <https://doi.org/10.1016/j.ymeth.2013.05.005>
- 538 Newman, M. E. J., & Barkema, G. T. (1999). *Monte Carlo Methods in Statistical Physics*.  
539        Clarendon Press Oxford.
- 540 Osgood, D. W. (1978). Effects of temperature on the development of meristic characters in  
541        *Natrix fasciata*. *Copeia*, 1978(1), 33–47.
- 542 P.Rifes, thesis: Fibronectin cues during somite formation, Universidade de Lisboa (2013).  
543        (n.d.).
- 544 Pannett, C., & Compton, A. (1924). the Cultivation of Tissues in Saline Embryonic Juice. *The*  
545        *Lancet*, 203(5243), 381–384. [https://doi.org/10.1016/S0140-6736\(01\)15954-4](https://doi.org/10.1016/S0140-6736(01)15954-4)
- 546 Peabody, R. B., & Brodie Jr., E. D. (1975). Effect of Temperature, Salinity and Photoperiod  
547        on the Number of Trunk Vertebrae in *Ambystoma maculatum*. *Copeia*, 1975(4), 741–  
548        746. <https://doi.org/10.2307/1443326>
- 549 Rancourt, D. E., Tsuzuki, T., & Capecchi, M. R. (1995). Genetic interaction between *hoxb-5*  
550        and *hoxb-6* is revealed by nonallelic noncomplementation. *Genes & Development*, 9(1),  
551        108–22. Retrieved from <http://www.ncbi.nlm.nih.gov/pubmed/7828847>

- 552 Richardson, M. K., Allen, S. P., Wright, G. M., Raynaud, a, & Hanken, J. (1998). Somite  
553 number and vertebrate evolution. *Development (Cambridge, England)*, *125*, 151–160.
- 554 Schmitz, M., Nelemans, B. K. A., & Smit, T. H. (2016). A Submerged Filter Paper Sandwich  
555 for Long-term Ex Ovo Time-lapse Imaging of Early Chick Embryos, (118), e54636.  
556 <https://doi.org/doi:10.3791/54636>
- 557 Schrägle, J., Huang, R., Christ, B., & Pröls, F. (2004). Control of the temporal and spatial  
558 Uncx4.1 expression in the paraxial mesoderm of avian embryos. *Anatomy and*  
559 *Embryology*, *208*(4), 323–32. <https://doi.org/10.1007/s00429-004-0404-3>
- 560 Slijepčević, M., Galis, F., Arntzen, J. W., & Ivanović, A. (2015). Homeotic transformations  
561 and number changes in the vertebral column of Triturus newts. *PeerJ*, *3*(11), e1397.  
562 <https://doi.org/10.7717/peerj.1397>
- 563 Stern, C. D., & Bellairs, R. (1984). The roles of node regression and elongation of the area  
564 pellucida in the formation of somites in avian embryos. *Journal of Embryology and*  
565 *Experimental Morphology*, *81*, 75–92.
- 566 Swat, M. H., Thomas, G. L., Belmonte, J. M., Shirinifard, A., Hmeljak, D., & Glazier, J. A.  
567 (2012). Multi-Scale Modeling of Tissues Using CompuCell3D. *Methods in Cell Biology*,  
568 *110*, 325–366. <https://doi.org/10.1016/B978-0-12-388403-9.00013-8>
- 569 Tahir, H., Niculescu, I., Bona-Casas, C., Merks, R. M. H., & Hoekstra, A. G. (2015). An in  
570 silico study on the role of smooth muscle cell migration in neointimal formation after  
571 coronary stenting. *Journal of The Royal Society Interface*, *12*(108).
- 572 Tam, P. P. (1981). The control of somitogenesis in mouse embryos. *Journal of Embryology*  
573 *and Experimental Morphology*, *65 Suppl*, 103–128.
- 574 Tibblin, P., Berggren, H., Nordahl, O., Larsson, P., & Forsman, A. (2016). Causes and  
575 consequences of intra-specific variation in vertebral number. *Scientific Reports*, *6*(April),  
576 26372. <https://doi.org/10.1038/srep26372>

- 577 van den Akker, E., Fromental-Ramain, C., de Graaff, W., Le Mouellic, H., Brûlet, P.,  
578 Chambon, P., & Deschamps, J. (2001). Axial skeletal patterning in mice lacking all  
579 paralogous group 8 Hox genes. *Development (Cambridge, England)*, 128(10), 1911–21.  
580 Retrieved from <http://www.ncbi.nlm.nih.gov/pubmed/11311170>
- 581 Varela-Lasheras, I., Bakker, A. J., van der Mije, S. D., Metz, J. A., van Alphen, J., & Galis, F.  
582 (2011). Breaking evolutionary and pleiotropic constraints in mammals: On sloths,  
583 manatees and homeotic mutations. *EvoDevo*, 2(1), 11. [https://doi.org/10.1186/2041-](https://doi.org/10.1186/2041-9139-2-11)  
584 9139-2-11
- 585 Voiculescu, O., Papanayotou, C., & Stern, C. D. (2008). Spatially and temporally controlled  
586 electroporation of early chick embryos. *Nat Protoc*, 3(3), 419–426.  
587 <https://doi.org/nprot.2008.10> [pii]r10.1038/nprot.2008.10
- 588 Watanabe, T., Sato, Y., Saito, D., Tadokoro, R., & Takahashi, Y. (2009). EphrinB2  
589 coordinates the formation of a morphological boundary and cell epithelialization during  
590 somite segmentation. *Proceedings of the National Academy of Sciences of the United*  
591 *States of America*, 106(18), 7467–72. <https://doi.org/10.1073/pnas.0902859106>

592 **Supporting Information**

593

594 **SI Materials and Methods**

595

596 **Egg handling**

597 Fertilized chicken eggs, white-leghorn, *Gallus gallus domesticus* (Linnaeus, 1758), were  
598 obtained from Drost B.V. (Loosdrecht, The Netherlands), incubated at 37,5°C in a moist  
599 atmosphere, and automatically turned every hour. After incubation for approx. 33 h, HH8-9  
600 embryos were explanted using filter paper carriers (Chapman et al., 2001) and cultured *ex ovo*  
601 as modified submerged filter paper sandwiches (Chapman et al., 2001; Schmitz et al., 2016)

602

603 **Culture medium**

604 Embryo culture medium consisted of Pannett-Compton (PC) saline (Pannett & Compton,  
605 1924; Schmitz et al., 2016; Voiculescu et al., 2008), mixed with freshly harvested thin  
606 albumen in a 3:2 ratio. PC stock solutions can be stored at 4 °C for several months, but PC  
607 saline (mixture of stock solutions and MilliQ-water) should be prepared freshly every week  
608 and stored at 4°C between experiments. Addition of Penicillin/Streptomycin (10000 U/ml) in  
609 100x dilution prevents occasionally appearing bacterial infections.

610

611 **Silicone sheets**

612 Silicone sheets protected embryos in culture from convection of the medium, thereby  
613 avoiding additional damage. Silicone sheets (ca. 350 µm in thickness) were made using a  
614 Sylgard® 184 Silicone Elastomer Kit as follows: A 15-cm plastic petri dish was placed on a  
615 scale and 6.165 g (5.554 mL) of base solution were pipetted into its center using a plastic  
616 transfer pipette (cut off tip). Then 0.206 g (0.2 mL) of curing agent were added using a glass

617 pipette. Base and curing agent were mixed slowly, using a wooden spatula and spread out  
618 over the bottom of the petri dish. The petri dish was placed into a vacuum chamber for 2 hrs  
619 to remove air bubbles and let silicone solution spread out equally. Exposure to 80 °C for ca. 2  
620 hrs let silicone polymerize and cure. Afterwards, silicone was let to cool to room temperature  
621 for about 5 hrs or overnight. Tweezers were used to free the borders of the silicone sheet from  
622 the walls of the petri dish and peel the sheet from the culture dish (wear gloves). Silicone was  
623 stored between sheets of a plastic document sleeve to prevent accumulation of dust. For  
624 preparing silicone sheets fitting in the setup, the plastic sleeve was removed from one side of  
625 the silicone sheet and the plastic stencil (Fig S1D) placed on it. A razor blade was used to cut  
626 around the outline of the stencil and the ten holes indicated by the stencil were cut out using a  
627 hole puncher. After removing the other plastic sleeve layer, silicone sheets were stored in a  
628 closed 10 cm petri dish.

629

### 630 **Filter paper carriers**

631 Filter paper carriers were prepared as described recently (Schmitz et al., 2016). Additionally,  
632 four holes were cut out from corners of the carriers (Fig S1C) to hook the filter paper  
633 sandwiches onto the pins of the motorized arms of the stretching setup (Fig S1A).

634

### 635 **Experimental setup - Embryo stretcher**

636 Embryos were cultured and mechanically manipulated on a custom-made embryo stretcher  
637 (Fig S1C). This setup allows to culture up to three embryos simultaneously in a variant of the  
638 recently described “submerged filter paper sandwich” (Schmitz et al., 2016). The setup  
639 consisted of a temperature-controlled medium container/ beaker surrounded by a metal frame.  
640 This frame carried two motorized translation stages mounted on opposing sides of the frame.  
641 Both stages could be operated with a manual controller. For one of the stages the control



642 could be switched to a custom-made LabVIEW routine. This routine allowed to define  
643 different automated pulling profiles for overnight experiments (see section ‘Stretching  
644 protocol’). Each stage carried a metal arm reaching into the medium container. Each metal  
645 arm ended with a horizontal platform equipped with three arrays of four smooth pins  
646 surrounding a threaded pin. The smooth pins functioned as hooks for the filter paper  
647 sandwiches and as a guide for metal washers clamping the filter paper sandwiches to the  
648 metal arms. Embryos were cultured fully submerged in the culture medium described above  
649 and the setup was prepared for an experiment as follows: The temperature-controlled beaker  
650 was placed in the center of the motorized x-y-stage of the upright zoom microscope. Then the  
651 frame carrying the two motorized translational stages was placed around the temperature-  
652 controlled beaker and fixed it with two lateral screws (Fig S1B). The two metal arms were  
653 attached to the motorized translational stages and fixed with the screws from top. Using the  
654 manual control, the position of the metal arms was adjusted so that the gap between them was  
655 12 mm, by bringing the left translational stage furthest to the right and the right translational  
656 stage furthest to the left. Then the temperature controlled beaker was filled with 200 mL of  
657 clean culture medium. Any dirt or bubbles were removed from the culture medium using a  
658 plastic transfer pipette. If necessary, the culture medium level was adjusted to make sure that  
659 the pins on the metal arms were just submerged. The temperature of the temperature-  
660 controlled beaker was set to 40°C. Then the silicone sheets were placed into the setup by using  
661 the blunt end of tweezers to hook the silicone sheets into the pins of the metal arms. Air  
662 bubbles were removed with a plastic transfer pipette. Then a chick embryo was explanted into  
663 a filter paper sandwich (Schmitz et al., 2016) (Fig S1A), immediately submerged into the  
664 culture medium and hooked it into the innermost pins of both metal arms by pushing it down  
665 with the tweezers (Fig S1A). The metal washers (Fig S1A and Fig S1E for dimensions) were  
666 placed over the pins of both metal arms and gently fixed by nuts using an Inbus® key (Fig

667 S1A). After successfully clamping three filter paper sandwiches into the setup, each filter  
668 paper sandwich was cut perpendicularly to the embryonic axis, about 1 mm posteriorly of the  
669 widest point of the elliptical aperture (dashed red line in Fig S1A-9). Iris scissors were used  
670 for these cuts. Then the surface of the culture medium was covered with 50 mL of light  
671 mineral oil using a plastic transfer pipette (Fig S1A-10). Note: After placing the mineral oil,  
672 the experiment is set and embryos cannot be replaced anymore without cleaning the whole  
673 setup. 25 mL of culture medium were removed from below the oil layer by pinching a plastic  
674 transfer pipette through the oil layer into the culture medium and the time-lapse acquisition  
675 was set up as described before (Schmitz et al., 2016).

676

#### 677 **Stretching protocol**

678 Embryos were exposed to a standardized stretching protocol which, in preliminary  
679 experiments, had proved to cause a strong deformation of the embryos' paraxial mesoderm  
680 without impairing the progression of development. The protocol started with a waiting period  
681 of 3.5 hrs after covering the culture medium with light mineral oil. This allowed damage,  
682 caused during preparation of the filter paper sandwich and perpendicular cutting, to heal.  
683 Then, two consecutive stretching intervals followed, separated by a pause of two hours to  
684 allow recovery of damaged tissue. Each stretching interval consisted of a slow displacement  
685 of the computer controlled metal arm (see red arrow in Fig S1) by 3.7 to 3.95 mm at a speed  
686 of 1.2  $\mu\text{m/s}$ . At this speed, each stretch took 53 to 55 min. Fig S2 depicts the user interface of  
687 the LabVIEW routine, prepared for an overnight experiment. Travel direction (left or right),  
688 speed (to be chosen from a 16-bit range defined by the microcontroller, where 40 equals 1.2  
689  $\mu\text{m/s}$ ) and time interval (in seconds) could be chosen independently for each experimental  
690 block.

691

692 **Macroscopic axial deformation**

693 The macroscopic axial deformation of the stretched embryos was determined by measuring  
694 their length from tip of the head to the posterior end of the sinus rhomboidalis, using the  
695 segmented line tool in ImageJ (white line in Fig S3A, B, E, F). We assumed that, during the  
696 application of the stretching, the natural morphogenetic changes of the embryos are negligible  
697 and length changes result from the external stretching only. We calculated the mechanical  
698 strain for the first and the second stretching as relative length change compared to the axial  
699 length before stretching. Results are presented in S1 Table. The first stretch lead to  $23 \pm 3$  %  
700 strain (average and standard deviation over all 21 embryos presented in S1 Table). The second  
701 pull caused  $19 \pm 3$  % strain.

702

703 **Somite formation time**

704 The separation of a newly forming somite from the anterior tip of the PSM and its  
705 epithelialization is a continuous process involving complex cellular rearrangements lasting  
706 longer than the 90 min usually stated to be characteristic for chick embryos (Martins et al.,  
707 2009). Nevertheless, we tried to assess the influence of mechanical deformation on  
708 somitogenesis by determining an average somite formation rate for stretched and control  
709 embryos using our dark field microscopic time-lapse movies and based our calculations on the  
710 physical separation of somites from the PSM. We counted the number of somites in stretched  
711 embryos at the end of the second pull and at the end of the experiment. If a somite had not  
712 completely separated from the PSM at the end of the second pull, the counting was started  
713 after formation of the following somite. From the total number of somites formed after the  
714 application of the second pull and the corresponding time interval we calculated the somite  
715 formation rate. The somite formation rate for control embryos was determined accordingly  
716 from the beginning of the culturing in the submerged filter paper sandwich. We did not

717 observe any difference in somite formation rate between stretched embryos with or without  
718 daughter formation or in comparison to non-stretched control embryos (S2 Table).

719

#### 720 **Proliferation rate and apoptotic rate**

721 Apoptotic (Cas3 staining, control n=4, pulled n=4 embryos) and proliferating (pHH3 staining,  
722 control n=6, pulled n=6 embryos) cells in somitic mesoderm lanes (somite S1 to S5) were  
723 counted in high-resolution confocal micrographs acquired on a Leica SP8 confocal  
724 microscope. At least 500 cells were counted per embryo. Apoptotic rate and proliferation rate  
725 were calculated as follows: (apoptotic/proliferation) rate (%) = number of positive staining  
726 cells/number of total cells×100. Statistical analysis was performed using GraphPad Prism  
727 software. Mann–Whitney unpaired non-parametric two-tail testing was applied to determine  
728 the P-values for the apoptotic and proliferation rates shown in Fig 3F. Control and pulled  
729 somitic mesoderm showed no significant differences in apoptotic (P=0.4286) and  
730 proliferation (P=0.7879) rates.

731

#### 732 **Epithelial cell percentages**

733 The percentage of epithelial cells in the equatorial z-plane of 13 daughter somite pairs,  
734 originating from the same mother somite, and 22 control somites was determined (*in vivo*). To  
735 that end, high-resolution confocal micrographs of embryos stained with DAPI for nucleic  
736 DNA were acquired on a Leica SP8 confocal microscope. Then somites were counted for  
737 (mesenchymal) core cells and epithelial cells to calculate epithelial cell percentages. *In silico*,  
738 cell percentages in 12 daughter somite pairs and 12 control somites were counted accordingly.  
739 Statistical analysis was performed using GraphPad Prism software. Unpaired parametric two  
740 tailed t-tests (with Welch's correction for unequal variance) were applied to determine P-

741 values for the epithelial percentages shown in the graph in Fig 3E. The percentages of  
742 epithelial cells change significantly *in vivo* ( $P < 0,0001$ ) and *in silico* ( $P < 0,0001$ ).

743

744

#### 745 **Aspect ratio determination and ROC curve**

746 The geometry of somites *in vivo* in controls and stretched embryos was described by  
747 measuring their length in rostro-caudal (x) and their width in medio-lateral (y) direction using  
748 the “Measure”-tool in ImageJ. Subsequently, the corresponding aspect ratio AR ( $AR = x/y$ )  
749 was calculated. Somites forming in controls and in stretched embryos after the second pull  
750 were measured upon their separation from the anterior tip of the PSM (Fig S7A-B). Somites  
751 that had been formed before were measured at the end of the second pull (Fig S7C). The  
752 aspect ratio of somites *in silico* was determined before (Fig S7D) and after the application of  
753 the pull (Fig S7E) accordingly (for strain regimes *in silico* see below). The corresponding  
754 receiver operating characteristics (ROC) curves (Goodenough et al., 1974; Hanley & McNeil,  
755 1982; Lusted, 1971; Metz, 1978) (Fig 3H) were generated by performing a binary logistic  
756 regression using the Data Analysis Tool of the Real Statistics Excel plugin Realstats  
757 (available at <http://www.real-statistics.com>). We analyzed how well the aspect ratio of  
758 stretched somites *in vivo* and *in silico* can predict the binary outcome of whether a somite will  
759 undergo division or not. This is measured by the area under the curve (AUC) in the ROC  
760 diagram. The AUC can vary between 0.5 (stochastic relation) and 1 (fully determined). 95%  
761 Confidence intervals for AUC values were calculated using the ‘ROC curve analysis’ tool of  
762 MedCalc software (available at <https://www.medcalc.org/index.php>).

763

#### 764 **Cellular Potts model of somite division**

765 To understand the influence of mechanical stretching on somites and the somite division  
766 observed *in vivo*, we constructed a two-dimensional mathematical model based on the  
767 Cellular Potts Model (Glazier & Graner, 1993; Graner & Glazier, 1992), representing a cross-  
768 section through a three-dimensional somitic tissue.

769

770 We made use of a compartmentalized Cellular Potts model (CPM), also known as Glazier-  
771 Graner-Hogeweg model. The model was implemented using CompuCell3D, an open source  
772 modeling package based on the CPM (Swat et al., 2012). CompuCell3D's  
773 'compartmentalized cell' module implements the compartmental CPM that represents  
774 biological cells as a collection of sub-cellular domains, each identified by a unique cluster  
775 index. This module allows specification of separate contact energies between the domains of a  
776 single cell (internal parameters) as well as specification of external contact energy parameters  
777 between cells of the same type and of different types. For more information on CPM  
778 modeling or compartmentalized cell module, please refer to Swat *et al.* (Swat et al., 2012).

779 Briefly, the compartmentalized CPM projects biological cells on a (usually regular,  
780 rectangular) lattice as domains of (usually) connected lattice sites. Each lattice site,  $\vec{x}$ , is  
781 associated with a domain index  $\sigma(\vec{x})$  that identifies a biological cell, a cellular compartment,  
782 or a volume element of extracellular material. Cell identification number  $\sigma = 0$  usually  
783 represents a generic 'medium'. Each domain  $\sigma$  has a type label  $\tau(\sigma(\vec{x})) \in \mathbb{N}$  to represent the  
784 generic 'type' (subcellular domain, ECM, and so forth) and an additional label  $\xi(\sigma(\vec{x})) \in \mathbb{N}$   
785 that bundles compartments to a biological cell or connected extracellular material. Although  
786 each individual object (subcellular compartment, ECM medium etc.) has its own unique  
787 domain index  $\sigma$ , many objects may be associated with the same type label  $\tau$ .

788

789 The evolution of our CPM is governed by a force-balance, represented by a Hamiltonian,  $H$ ,

$$H = H_{contact} + H_{volume} + H_{spring} , \quad (Eq. 1)$$

790

791 which describes the dynamics of cells (e.g. cell behaviors, properties and interactions). The  
792 Hamiltonian is minimized using a Metropolis algorithm that mimics microscopic membrane  
793 and material fluctuations, such that both the equilibrium and the transient towards the  
794 equilibrium can be physically and biologically interpreted (Newman & Barkema, 1999).  
795  $H_{contact}$  represents the cell adhesion where cell-cell and cell-medium interactions take place  
796 through contact energies. The size of the interface between two cells defines the contact  
797 energy and is given by:

798

$$H_{contact} = \sum_{(\vec{x}, \vec{x}')} J_{\tau(\sigma(\vec{x})), \tau(\sigma(\vec{x}'))} (1 - \delta_{\sigma(\vec{x}), \sigma(\vec{x}'))} \quad (Eq. 2)$$

799

800 Here,  $J_{\tau(\sigma(\vec{x})), \tau(\sigma(\vec{x}'))}$  is the bonding energy between two neighboring cell types  $\tau(\sigma(\vec{x}))$  and  
801  $\tau(\sigma(\vec{x}'))$ , and  $\delta_{\sigma(\vec{x}), \sigma(\vec{x}'))}$  is the Kronecker delta term in which adhesion is restricted to the cell  
802 membranes by eliminating the contributions from the neighboring lattice sites belonging to  
803 the same cell. If  $\sigma(\vec{x}) = \sigma(\vec{x}')$ , the delta function returns a value of 1 and 0 otherwise. The  
804 term  $H_{volume}$  in the Hamiltonian specified in Eq. 1 is given by:

805

$$H_{volume} = \sum_{\sigma} \lambda_{volume}(\sigma) \cdot [v(\sigma) - V(\sigma)]^2 \quad (Eq. 3)$$

806

807 and constrains the cell volume,  $v(\sigma)$ , close to a resting volume  $V(\sigma)$ . The Lagrange multiplier  
808  $\lambda_{volume}$  represents cell elasticity - higher values of  $\lambda_{volume}$  reduce fluctuations of cell's  
809 volume from its target volume.



810

811 Compartments of cells and subunits of the extracellular matrix can be mechanically coupled  
812 by connecting their centers of mass using springs. Each spring contributes an additional  
813 energy bias  $H_{spring}$  to the Hamiltonian in Eq. S2.

814

$$H_{spring} = \sum \lambda_{ij} (l_{ij} - L_{ij})^2 \quad (Eq. 4)$$

815 where  $l_{ij}$  is the absolute distance between the center of masses of cells  $i$  and  $j$  and  $L_{ij}$  is the  
816 specified target spring length.  $\lambda_{ij}$  is an elasticity parameter. Springs rupture if they exceed a  
817 threshold length; new springs are formed if cells move within a threshold distance. In our  
818 simulations, we have many cell types (epithelial internal compartments, extracellular matrix  
819 (ECM), and epithelial cell (apical)) which are connected using springs. Details on these cell-  
820 specific spring lengths and elasticity are explained in the next sections of the supplementary  
821 material.

822

823 The CPM is updated using a Metropolis algorithm, which mimics the extension and retraction  
824 of pseudopods of the biological cells, and fluctuations of the extracellular matrix materials.  
825 The algorithm iteratively selects a lattice site  $\vec{x}$  and attempts to copy its cell index  $\sigma(\vec{x})$  into a  
826 randomly chosen adjacent lattice site  $\vec{x}'$ . This is called a copy attempt. The probability of  
827 accepting or rejecting the attempted copy update is based on the energy minimization criteria  
828 and follows Boltzmann probability,

829

$$P(\sigma(\vec{x}) \rightarrow \vec{x}') = \begin{cases} 1 & , \Delta H(\sigma(\vec{x}) \rightarrow \vec{x}') < 0 \\ e^{-\frac{\Delta H(\sigma(\vec{x}) \rightarrow \vec{x}')}{T}} & , \Delta H(\sigma(\vec{x}) \rightarrow \vec{x}') \geq 0 \end{cases} \quad (Eq. 5)$$

830

831 where  $\Delta H(\sigma(\vec{x}) \rightarrow \vec{x}')$  represents the change in the Hamiltonian due to the copy attempt.  
832 Eq. 5 shows that if the attempted copy update will reduce the energy, i.e.  $\Delta H(\sigma(\vec{x}) \rightarrow \vec{x}') <$   
833 0, the update is accepted with a probability of 1. However, if the energy increases due to the  
834 copy-attempt, the system follows Boltzmann probability to accept or reject a copy-attempt.  
835 The parameter  $T$  is the cellular temperature, representing the amplitude of active cell  
836 membrane fluctuations or fluctuations of the extracellular materials.

837

838 The model included the following assumptions: (i) the tissue surrounding the somite can be  
839 approximated as elastic, and was modeled as a non-specified extracellular matrix (ECM); (ii)  
840 the somite consists of polarized epithelial cells forming the outer layer (Dias et al., 2014),  
841 while the somite core (somitocoel) consists of unpolarized mesenchymal cells. The  
842 mesenchymal cells in the core of the somite were represented by single-compartment, non-  
843 coupled and non-polarized cells. Following Dias *et al.* (Dias et al., 2014) the epithelial cells in  
844 our model consisted of three domains, called ‘apical’, and ‘lateral’ and ‘basal’ (Fig S9). The  
845 three compartments were initially distributed at random inside an epithelial cell and after a  
846 brief relaxation period of 1500 MCS (epithelial polarization time), these compartments were  
847 connected internally to one another using linear elastic springs (Eq. 4). To achieve epithelial  
848 elongation (Fig S9), target lengths of all internal springs ( $L_{apical-lateral}$ ,  $L_{apical-basal}$ ,  
849  $L_{lateral-basal}$ ) were individually incremented by 1 every 20<sup>th</sup> MCS within the elongation time  
850 frame (1500 MCS), until every spring reached its final specified target length  
851 ( $L_{apical-lateral} = 15$ ,  $L_{apical-basal} = 30$ ,  $L_{lateral-basal} = 20$ ). The ECM, with its main  
852 functional component fibronectin *in vivo* (“P.Rifes, thesis: Fibronectin cues during somite  
853 formation, Universidade de Lisboa (2013),” n.d.), was modeled as a network of cells. These  
854 ECM cells were also connected to each other using elastic springs of target length

855  $L_{ecm-ecm} = 10$  with elastic stiffness  $\lambda_{ecm-ecm} = 200$ . This was necessary to obtain a  
856 desired stiffness of the ECM in order to keep it intact during and after stretching.

857

858 We first attempted to construct a well-organized, initial epithelial structure as a starting point  
859 for the stretching model. Contact energies between domains as well as contact energies with  
860 other cell types and the ECM were set according to S3 Table. In absence of quantitative  
861 values for the adhesion strengths and interfacial tensions between the cells, we estimated  
862 parameter values for which a stable epithelial monolayer is maintained in our simulations,  
863 followed by parameter sensitivity studies. We assumed the apical domains of adjacent  
864 epithelial cohered strongly, following Dias *et al.*'s (Dias et al., 2014) assumption mimicking  
865 the distribution of N-Cadherin *in vivo* (Chal, Guillot, & Pourquié, 2016). The lateral domains  
866 of epithelial cells (between the apical and basal domains) adhere strongly to each other,  
867 similar to Cadherin mediated cohesion *in vivo* (Horikawa et al., 1999; Kimura et al., 1995).  
868 To represent the apical actin ring, each center of mass of an apical unit was connected to the  
869 center of mass of neighboring apical domains on either side (left and right) using elastic  
870 springs of a resting length of  $L_{ij} = 4$  with elastic stiffness  $\lambda_{apical-apical} = 100$ .

871

872 The monolayer of epithelial cells was constructed by initializing the simulation with a  
873 collection of mesenchymal cells surrounded by an elastic ECM. We selected a mesenchymal  
874 cell at the boundary with the surrounding ECM and made it epithelial. This first epithelialized  
875 cell induced MET in neighboring cells based on basolateral contact (Baum & Georgiou, 2011;  
876 Campbell et al., n.d.), which finally led to a fully epithelialized somite-like structure (initial  
877 phase of Movie S3).

878

879 After a stable, somite-like, epithelial structure had formed, we gradually strained the  
880 extracellular matrix in our simulations, in order to mimic the experimental setup. To this end,  
881 we connected two ‘walls’ constructed out of immobile cells to the left and right-hand ends of  
882 the ECM using stiff elastic springs and slowly moved the walls apart by 1 pixel every 50  
883 MCS, using a technique introduced previously for simulating the compression of tissue  
884 spheroids (Marmottant et al., 2009) and the application of stents in arteries (Tahir, Niculescu,  
885 Bona-Casas, Merks, & Hoekstra, 2015)

886

887 The stretching rate was sufficiently slow (walls moved outward by 1 pixel every 50 MCS),  
888 such that it did not damage the ECM cells (Phase 2 in Movie S3). We tested three MET  
889 scenarios for their ability to allow the stretched somite to divide into epithelialized daughter  
890 somites. We first assumed that somites can divide by reorganization of existing epithelial cells  
891 and allowed no MET after the stretching. We could successfully deform the somite by  
892 stretching, but neither small nor large strains induced somite division (Fig S10, top row). This  
893 suggested the necessity of an MET mechanism to enable somite division. In the second  
894 scenario, a mesenchymal cell underwent MET after contact with the surrounding ECM for a  
895 certain time (600 MCS). We did not observe somite division for different levels of  
896 deformation, probably because intercellular connections between epithelial cells did not  
897 soften completely upon stretching, thereby avoiding sufficient contact between mesenchymal  
898 somitocoel cells and the surrounding ECM to induce additional MET (Fig S10, middle row).  
899 In the third scenario, the MET occurred after sufficiently long contact of mesenchymal cells  
900 to the basal or lateral membrane of epithelial cells (600 MCS). Upon stretching, several  
901 springs between neighboring apical compartments released and mesenchymal cells from the  
902 core became exposed to the lateral or basal membranes of epithelial cells leading to additional  
903 MET. These additional epithelial cells disturbed the equilibrium and could not get

904 incorporated into the original epithelial ring. So, the epithelium started to reorganize and  
905 divide into daughter somites (Fig S10, bottom row and Phase 3 in Movie S3).

906

907 Based on our observations that daughter somites are separated and presumably stabilized by a  
908 newly forming fibronectin matrix (Fig S4), we also implemented a similar rule for ECM  
909 production by the basal units of epithelial cells. If the basal domain of an epithelial cells is not  
910 attached to a specified amount of ECM (given by threshold value) for a certain duration, it  
911 produces an additional ECM cell. This production continues until the threshold value is  
912 reached again. Such production of the fibronectin allows the dividing somites to separate from  
913 each other permanently. The parameters used in the simulations are shown in the S3 Table.  
914 For a systematical analysis of how well the geometry of stretched somite predicts division we  
915 applied lateral wall displacements of 30 to 110 pixels (15 to 55 pixels per side), resulting into  
916 aspect ratio values similar to stretched somites *in vivo* (Fig 3G).

917

918 The *in silico* somite model can be parameterized to the experimentally observed ratio of  
919 mesenchymal and epithelial cells. Fig S11 shows that, following the MET based on the  
920 basolateral contact rule, initial epithelialization of the somite and division of the somites after  
921 stretching can be achieved with a large core and small core somite.

922

923 In order to further validate the *in silico* model, we also tested the influence of decreased  
924 cohesion between lateral domains of epithelial cells in epithelializing, non-stretched somites.  
925 Similar to results in *N-Cadherin/cad11* double-homozygous mouse mutants (Horikawa et al.,  
926 1999), we observed subdivisions into small cell clusters of epithelioid morphology (Fig S12).

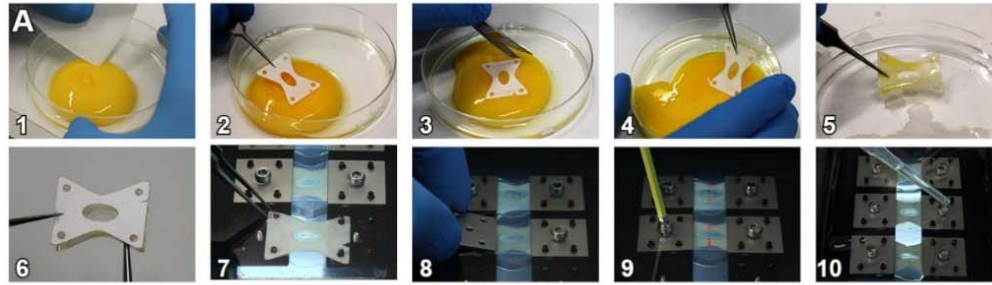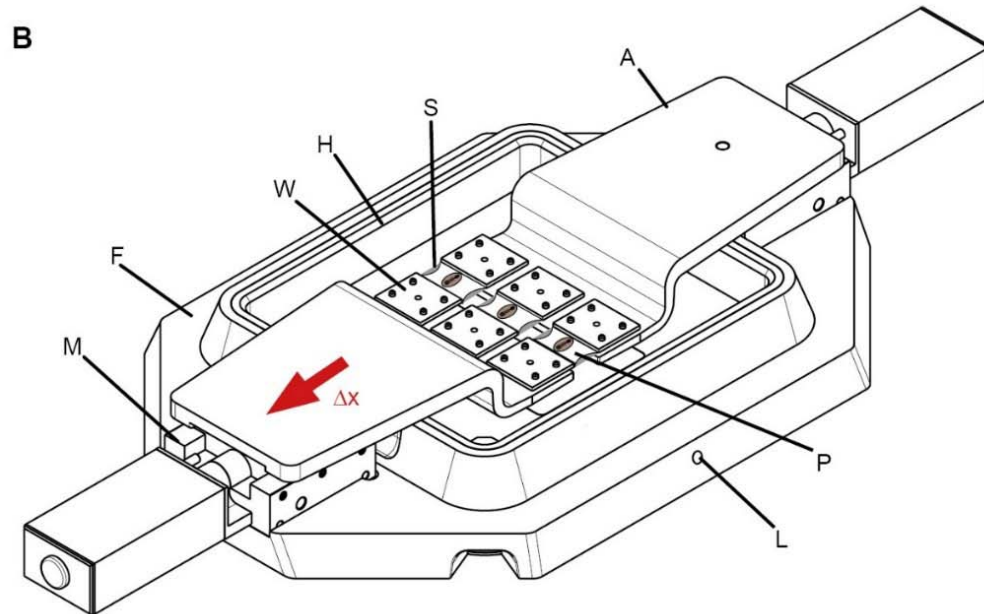

- |    |                |    |                       |
|----|----------------|----|-----------------------|
| A: | Metal arm      | M: | Motorized stage       |
| F: | Frame          | P: | Filter paper sandwich |
| H: | Heated beaker  | S: | Silicone sheet        |
| L: | Lateral screws | W: | Washer                |

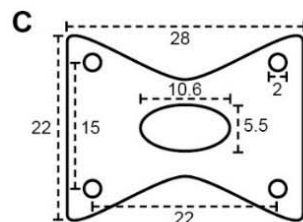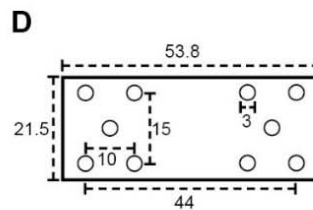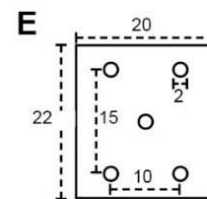

927

928 **Fig S1: Chick embryo stretching *ex ovo*, experimental setup.** (A) Explantation procedure  
 929 (Schmitz et al., 2016). (1) An egg is cracked into petri-dish and thick albumen removed from  
 930 top of the yolk. (2) A filter paper carrier is placed on top of the yolk, surrounding the  
 931 blastoderm. (3) The filter paper carrier is cut loose from the surrounding vitelline membrane  
 932 and (4) removed from top of the yolk. (5) Remaining yolk is carefully washed away in a

933 saline bath. (6) The embryo is sandwiched with a second filter paper carrier. (7) The filter  
934 paper sandwich is submerged into the medium and hooked into the pins of the motorized  
935 arms. A thin sheet of PDMS protects the embryo from convection of the medium. (8) Washer  
936 plates clamp the filter paper sandwich to the metal arms and (9) are carefully pressed down by  
937 nuts. Filter paper sandwiches are cut along dashed red lines for later stretching of embryos.  
938 (10) The medium is covered with a layer of light mineral oil. (B) Schematic view of the  
939 embryo stretcher. The frame carries the motorized stages and keeps the temperature-  
940 controlled medium container in position. The whole setup is placed on a motorized x-y-stage,  
941 embryos are imaged from above and illuminated from below through the glass bottom of the  
942 medium container. (C) Filter paper carrier dimensions (in mm). (D) Dimensions of stencil for  
943 PDMS sheets (in mm). (E) Dimensions of metal washers used to clamp the filter paper (in  
944 mm).



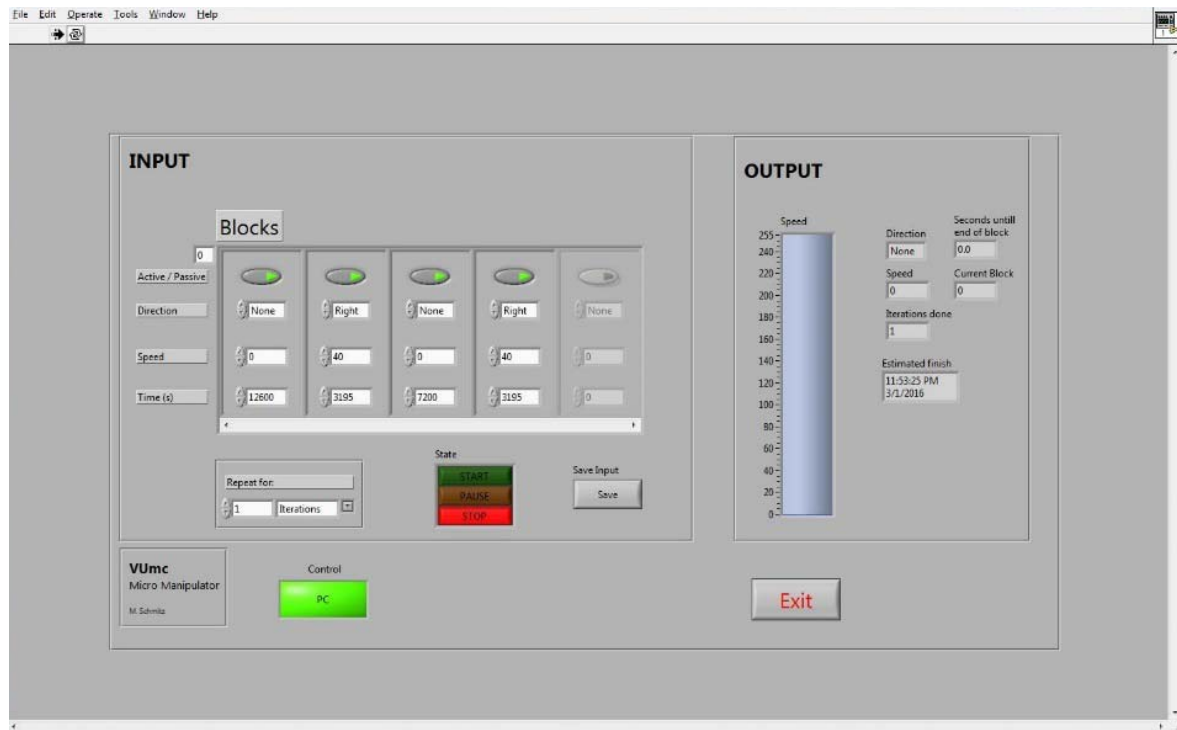

945

946 **Fig S2: User interface of the custom-made LabVIEW routine used to control one**  
947 **motorized translation stage of the embryo stretcher.** Four experimental blocks are  
948 activated, defining the resting time after covering the culture medium with light mineral oil  
949 (12600 s/3.5 hrs), the first pulling block (3195 s), a resting time in between pulls (7200 s/2  
950 hrs) and the second pulling block (3195 s).

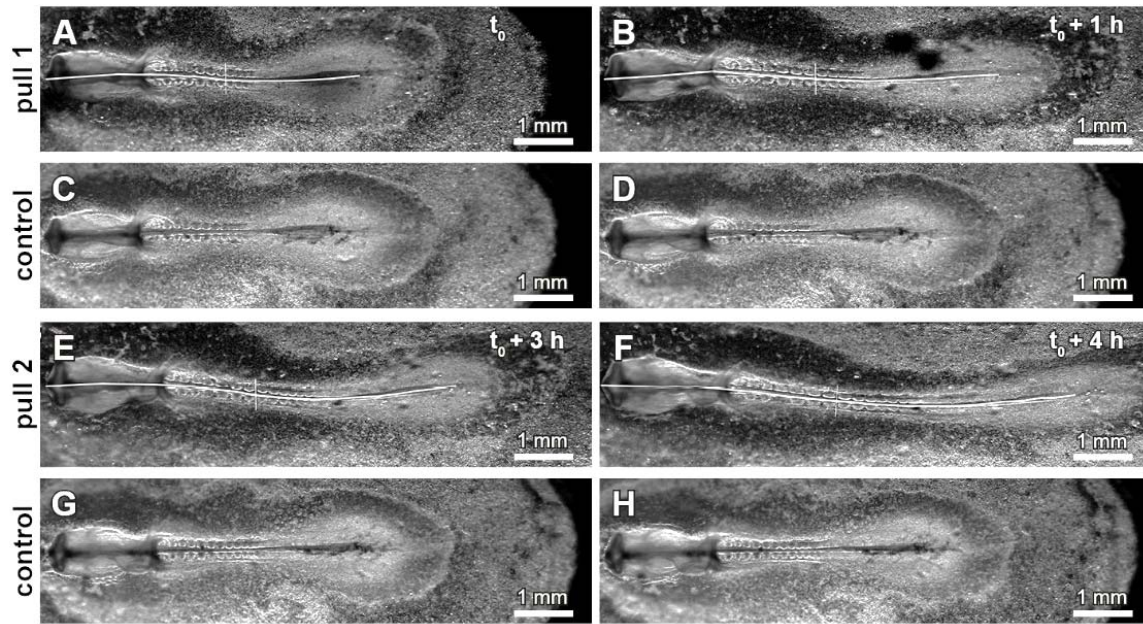

951

952 **Fig S3: Macroscopic deformation of pulled embryos.** Before application of the first pull,  
953 experimental embryo (A) and control (C) are similar in axial length. The first pull increases  
954 the axial length of the pulled embryo considerably compared to the control (compare B and  
955 D). This length difference remains over the waiting period between first and second pull  
956 (compare B and D and E and G). The second pull increases the length difference between  
957 pulled embryo and control even further (compare F and H).

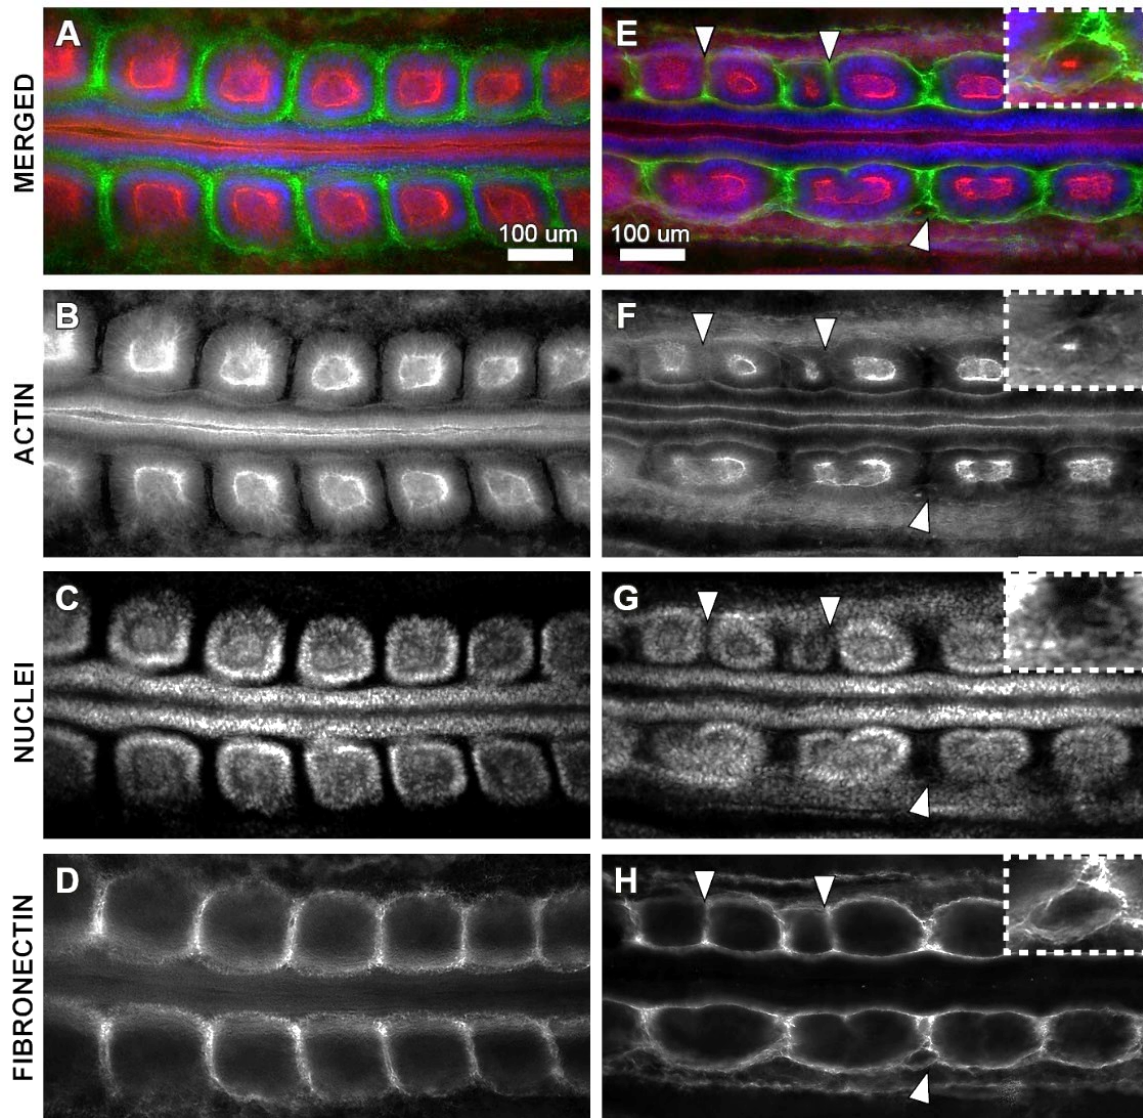

958

959 **Fig S4: Fibronectin distribution around daughter somites.** Widefield fluorescent  
960 micrographs of control embryo (A-D) and stretched embryo (E-H) stained for actin (red),  
961 DNA in cell nuclei (blue) and extracellular matrix component fibronectin (green). Ventral  
962 view, anterior is to the left. Daughter somites are surrounded and separated from each other  
963 by a newly formed fibronectin matrix (white arrowheads in E and H) and can be extremely  
964 small (inset E to H) and lacking a mesenchymal core.



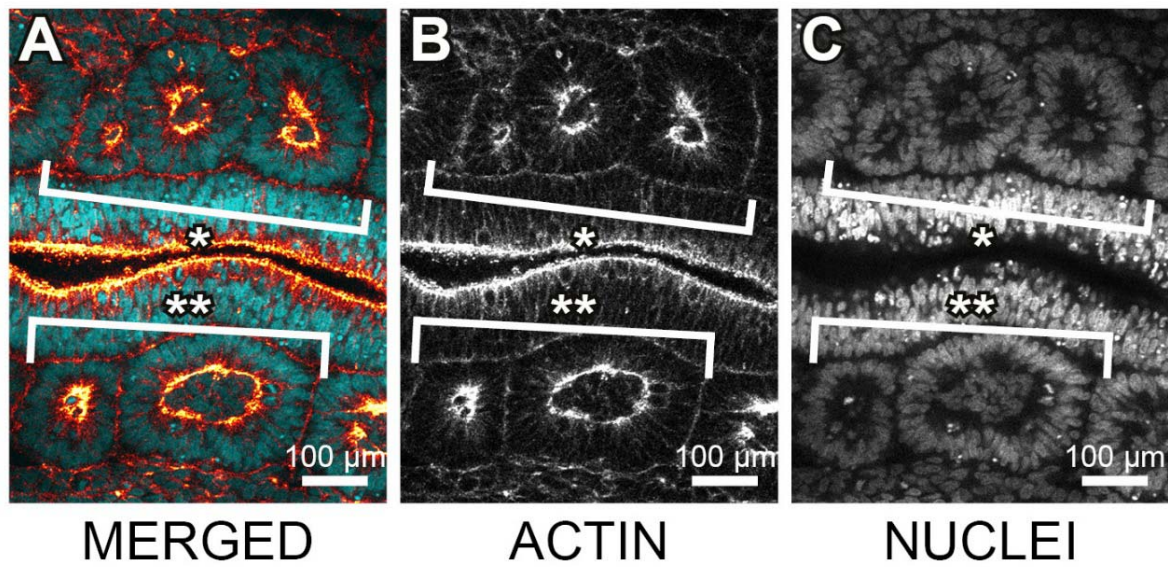

965

966 **Fig S5: Versatile daughter somite morphologies.** Confocal micrograph of daughter somites  
967 on both sides of the midline in stretched and fixated chick embryo stained for actin (red) and  
968 DNA in cell nuclei (blue). Anterior is to the left, ventral view. Daughter somites do not only  
969 result from splitting into anterior and posterior compartment of original somite, but can also  
970 reorganize into three daughter somites (\*) or two unequally sized daughter somites (\*\*).

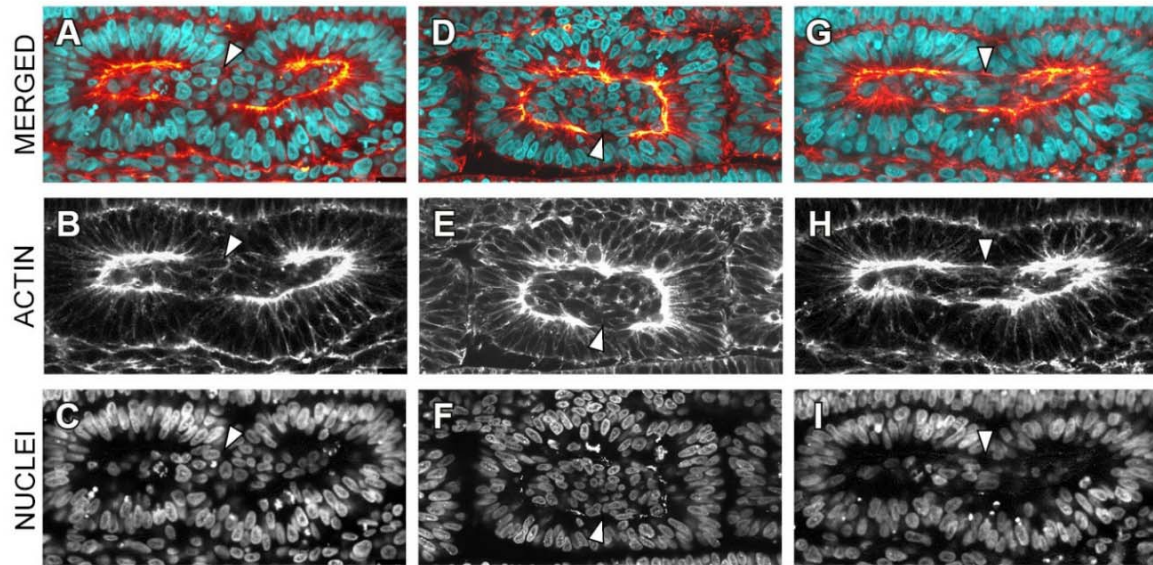

971

972 **Fig S6: Fracture of epithelial sheet and potential MET of mesenchymal somitocoel cells.**

973 Confocal micrograph of somites, fixated during daughter somite formation in stretched chick

974 embryos, stained for actin (orange) and DNA in cell nuclei (cyan). Anterior is to the left.

975 White arrowheads indicate discontinuities in the apical actin ring of the somitic epithelium,

976 suggesting a local opening of the epithelial sheet and potential interfaces for the recruitment

977 of additional mesenchymal cells from the somitocoel for their incorporation into the existing

978 epithelium.

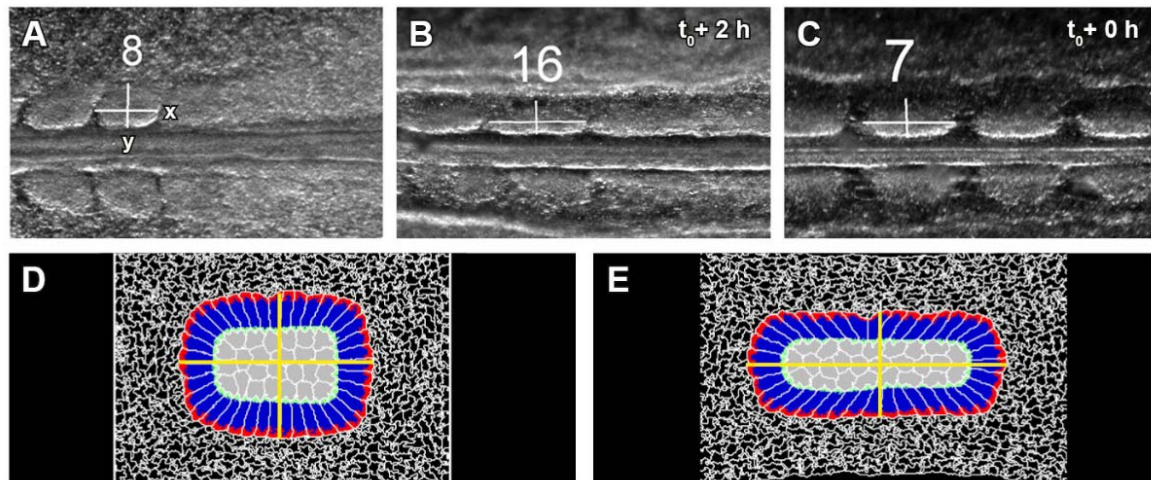

979

980 **Fig S7: Determination of somite aspect ratios.** Measuring the length (x) and width (y) of  
981 somites upon separation from the anterior tip of the PSM in control embryos (A) and stretched  
982 embryos (B), and after application of the second pull (C). Somites in (B) and (C) underwent  
983 division later. Anterior is to the left. Aspect ratio determination *in silico* before (D) and  
984 (E) the pull.

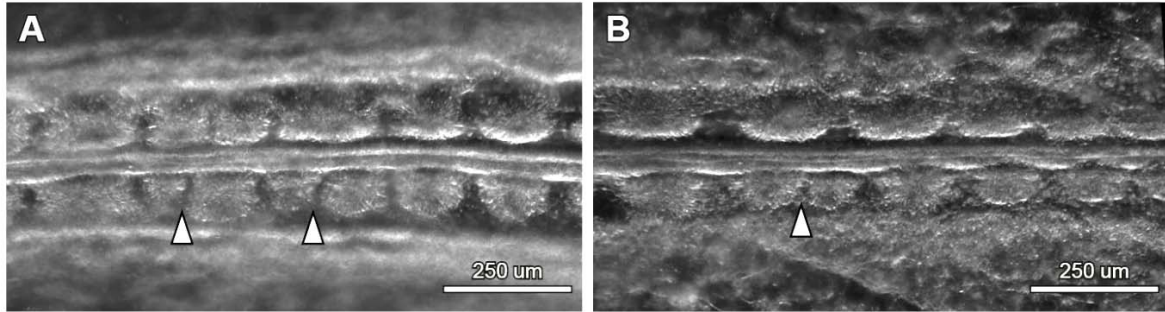

985

986 **Fig S8: Unequally sized daughter somites.** Anterior is to the left. White arrowheads indicate

987 gaps between unequal daughter somite pairs.



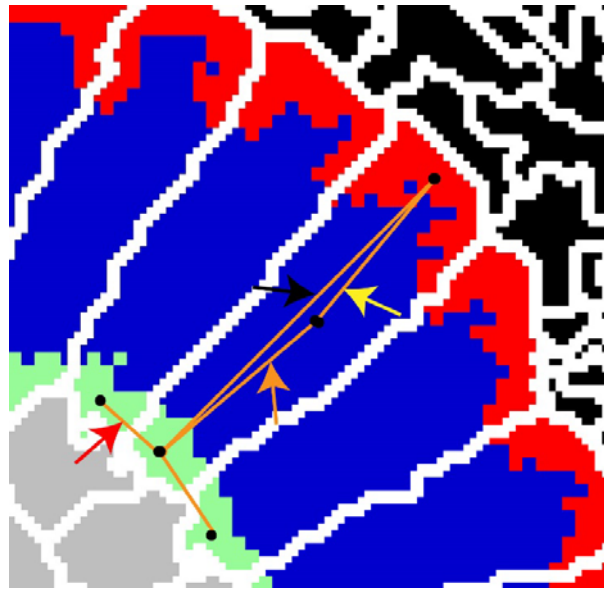

988

989 **Fig S9:** Snapshot of various cell types present in the simulations. Mesenchymal cells shown  
990 in grey. Epithelial cells consist of three domains: Apical (green), lateral (blue) and basal (red)  
991 domain. Center of masses (black dots) of epithelial cell domains are connected internally to  
992 each other using elastic springs. The springs between apical and lateral domain (orange  
993 arrow), lateral and basal domain (yellow arrow) and apical and basal domain (black arrow)  
994 are indicated. Each epithelial cell has the same spring configuration helping epithelial cells to  
995 elongate after polarization. Apical domains of neighboring are also connected via springs (red  
996 arrow) to trigger the formation of single layer of epithelial cells. Black cells in the upper right-  
997 hand corner represent ECM.

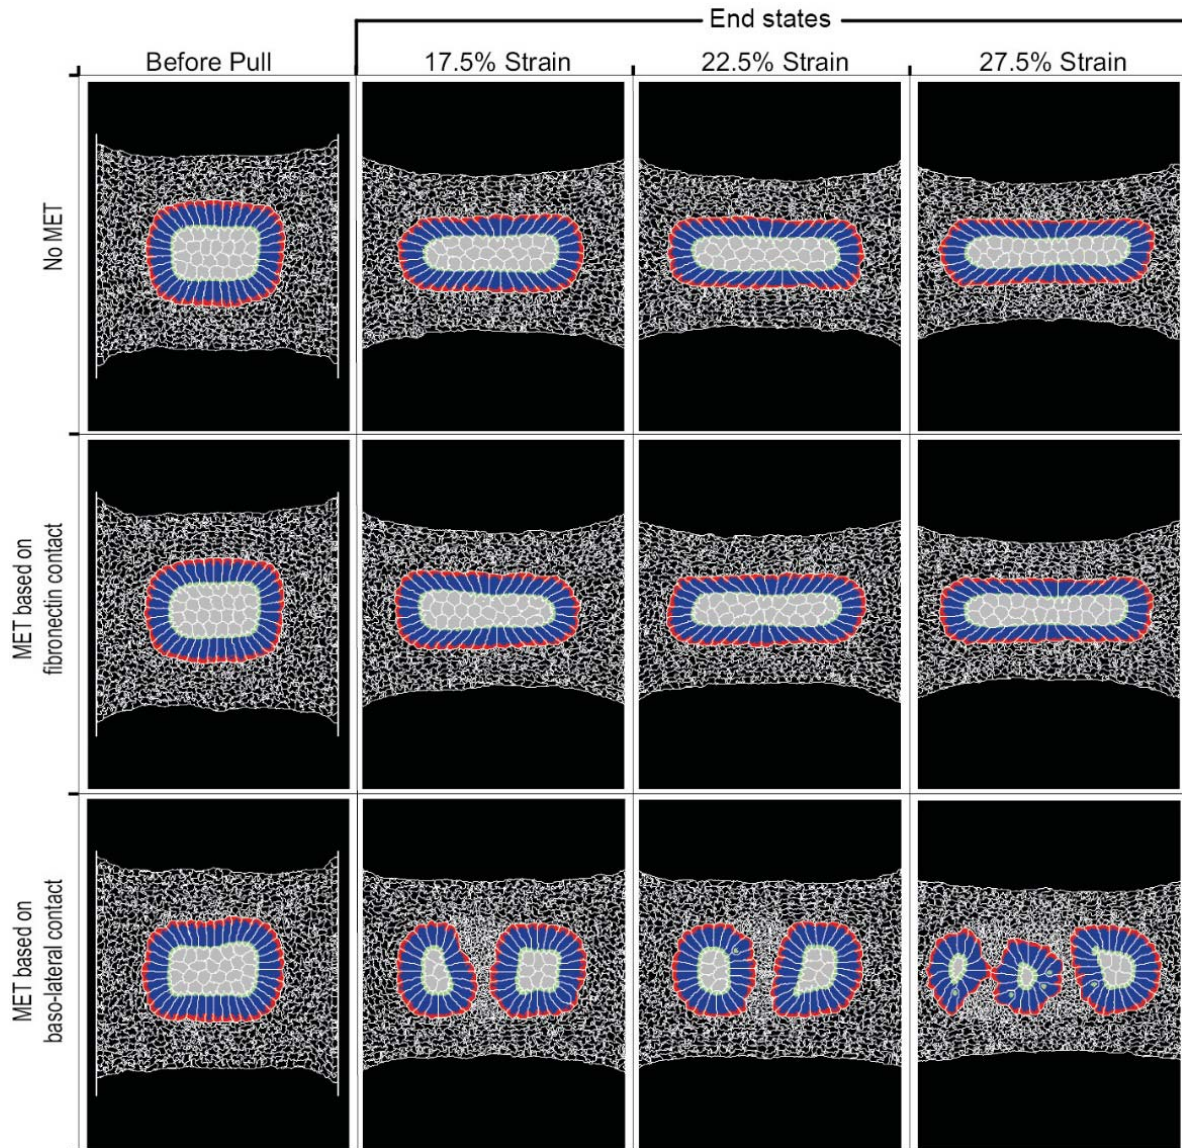

998

999 **Fig S10: End states of simulations, testing different mesenchymal-epithelialization**

1000 **transition rules.** Fully epithelialized somites were exposed to different strains (strain given

1001 by relative change in distance between movable walls), inducing aspect ratios of 2.5 (17.5%

1002 strain), 2.9 (22.5% strain) and 3.3 (27.5%) (compare Fig 3G). *Top row:* No MET was allowed

1003 after the pull. This was due to our initial hypothesis that somite doubling is nothing more than

1004 the reorganization of existing epithelial cells. We applied different strain values to see if high

1005 strain might lead to somite doubling. No somite division was observed. *Middle row:* MET

1006 was allowed after the pull if a cell had been in contact to the surrounding ECM matrix for a

1007 certain period of time. This MET rule did not allow somite division under various strain  
1008 conditions. *Bottom row:* A new rule allows MET of mesenchymal cells upon contact to the  
1009 lateral or basal membranes of epithelial cells. Formation of stable daughter somites could be  
1010 observed. Both, ECM (fibronectin) induced epithelialization and basolateral contact induced  
1011 epithelializing were sufficient to generate fully epithelialized somite-like structures prior to  
1012 stretching.

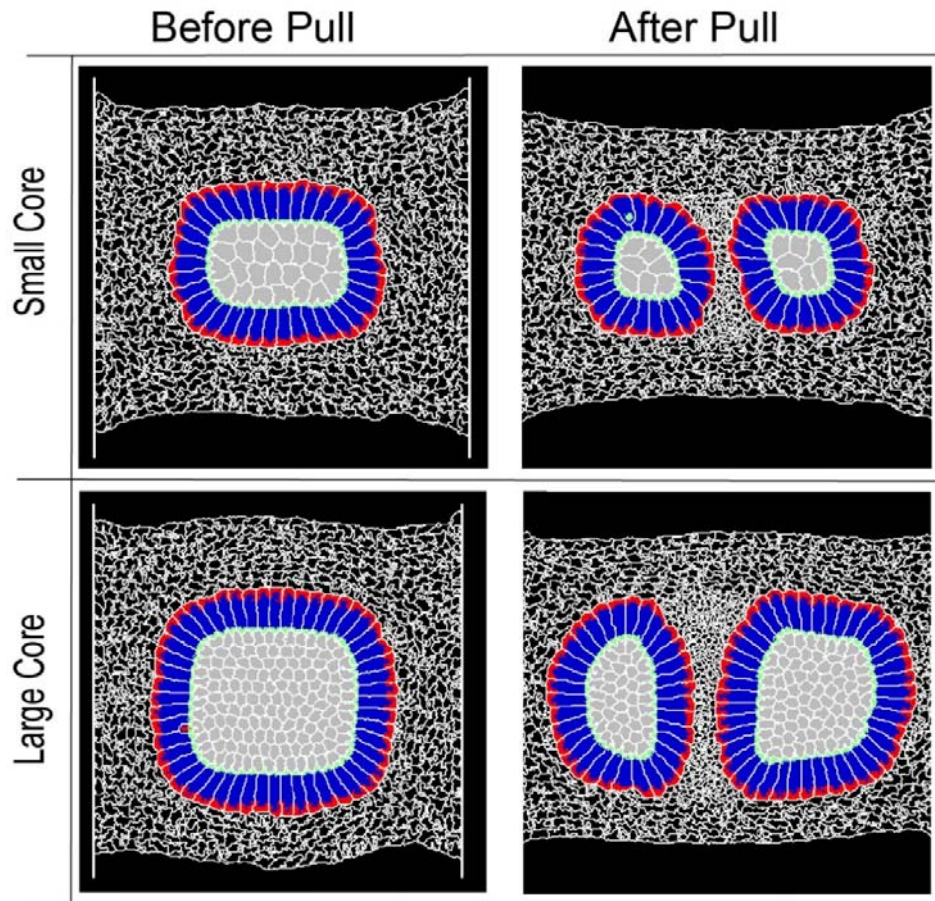

1013

1014 **Fig S11: Different somite core sizes and mesenchymal cell sizes.** *Top row:* Small core  
1015 somite before and after pull showing somite divisions after pull. Similar response of somite  
1016 division can also be seen in the large core somite (*Bottom row*). This in silico model of somite  
1017 division also allows to change the size of the cells. This is evident by comparing the size of  
1018 the core mesenchymal cells (in grey) in the top and bottom rows.



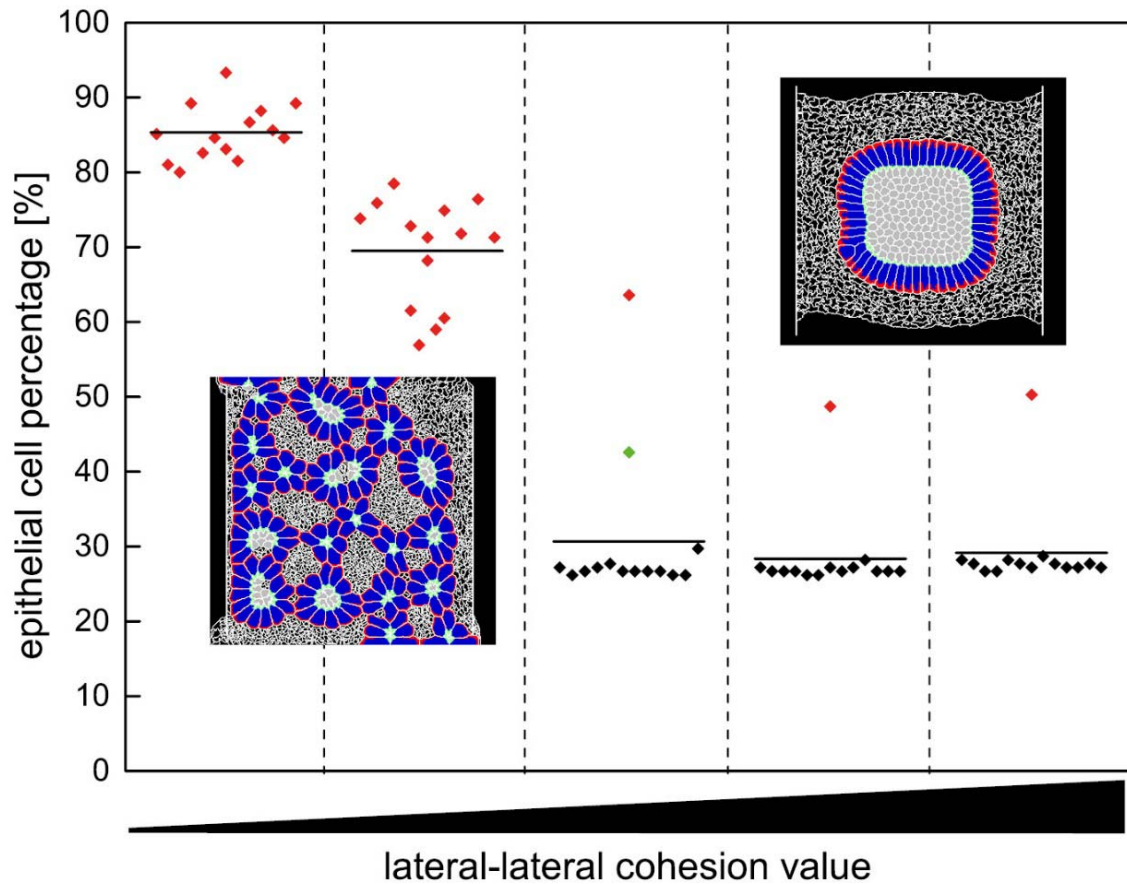

1019

1020 **Fig S12: Influence of cohesion between lateral domains of epithelial cells on daughter**  
1021 **somite number and epithelial cell percentages *in silico*.** Cohesion between lateral domains  
1022 of epithelial cells was varied in non-stretched somites to study the effect on somite formation.  
1023 With low cohesion, almost 85% of mesenchymal cells became epithelial. This increase in  
1024 epithelial cell number resulted in the formation of many epithelialized cell clusters (red data  
1025 points), whereas for high cohesion values, we observed no somite division except for one case  
1026 (green data point). Non-dividing somites are indicated by black data points.

1027 **S1 Table: Mechanical strain caused by application of the external mechanical pull.**

1028

| Daughter somite formation? | Embryo No. | Distance per pull [mm] | Mechanical Strain [%] |        |
|----------------------------|------------|------------------------|-----------------------|--------|
|                            |            |                        | pull 1                | pull 2 |
| Yes                        | 1          | 3.85                   | 21                    | 19     |
|                            | 2          | 3.8                    | 21                    | 20     |
|                            | 3          | 3.7                    | 21                    | 20     |
|                            | 4          | 3.85                   | 26                    | 16     |
|                            | 5          | 3.85                   | 26                    | 21     |
|                            | 6          | 3.85                   | 21                    | 17     |
|                            | 7          | 3.85                   | 26                    | 15     |
|                            | 8          | 3.85                   | 25                    | 17     |
|                            | 9          | 3.85                   | 26                    | 15     |
|                            | 10         | 3.9                    | 27                    | 24     |
|                            | 11         | 3.95                   | 28                    | 19     |
|                            | 12         | 3.95                   | 18                    | 20     |
|                            | 13         | 3.95                   | 24                    | 22     |
|                            | 14         | 3.95                   | 22                    | 18     |
|                            | 15         | 3.95                   | 20                    | 19     |
|                            | 16         | 3.95                   | 22                    | 15     |
| No                         | 17         | 3.85                   | 23                    | 19     |
|                            | 18         | 3.8                    | 22                    | 18     |
|                            | 19         | 3.85                   | 21                    | 19     |
|                            | 20         | 3.85                   | 25                    | 13     |
|                            | 21         | 3.7                    | 18                    | 17     |

1029

1030 **S2 Table: Somite formation rates for stretched embryos, with and without daughter**

1031 **somite formation, and control embryos.**

1032

| <b>Daughter<br/>somite<br/>formation?</b> | <b>Embryo<br/>No.</b> | <b>Somite No.<br/>initial</b> | <b>Somite No.<br/>final</b> | <b>Time<br/>interval<br/>[min]</b> | <b>Somite<br/>formation<br/>rate<br/>[min/somite]</b> |
|-------------------------------------------|-----------------------|-------------------------------|-----------------------------|------------------------------------|-------------------------------------------------------|
| <b>YES</b>                                | 1                     | 10                            | 18                          | 610                                | 76.3                                                  |
|                                           | 2                     | 9                             | 19                          | 785                                | 78.5                                                  |
|                                           | 3                     | 14                            | 22                          | 636                                | 79.5                                                  |
|                                           | 4                     | 14                            | 20                          | 498                                | 83.0                                                  |
|                                           | 5                     | 13                            | 20                          | 618                                | 88.3                                                  |
|                                           | 6                     | 14                            | 21                          | 536                                | 76.6                                                  |
|                                           | 7                     | 14                            | 20                          | 520                                | 86.7                                                  |
|                                           | 8                     | 12                            | 19                          | 524                                | 74.9                                                  |
|                                           | 9                     | 13                            | 21                          | 584                                | 73.0                                                  |
|                                           | 10                    | 6                             | 13                          | 565                                | 80.7                                                  |
|                                           | 11                    | 12                            | 17                          | 451                                | 90.2                                                  |
|                                           | 12                    | 17                            | 24                          | 556                                | 79.4                                                  |
|                                           | 13                    | 15                            | 24                          | 723                                | 80.3                                                  |
|                                           | 14                    | 15                            | 21                          | 510                                | 85.0                                                  |
|                                           | 15                    | 15                            | 22                          | 553                                | 79                                                    |
|                                           | 16                    | 17                            | 25                          | 523                                | 65.4                                                  |
| <b>Average ± Stdev.:</b>                  |                       |                               |                             |                                    | <b>79.8 ± 6.2</b>                                     |
| <b>NO</b>                                 | 17                    | 15                            | 22                          | 578                                | 82.6                                                  |
|                                           | 18                    | 11                            | 21                          | 795                                | 79.5                                                  |
|                                           | 19                    | 17                            | 23                          | 413                                | 82.6                                                  |
|                                           | 20                    | 15                            | 21                          | 510                                | 85                                                    |
|                                           | 21                    | 12                            | 22                          | 826                                | 82.6                                                  |
| <b>Average ± Stdev.:</b>                  |                       |                               |                             |                                    | <b>82.5 ± 2.0</b>                                     |
| <b>Controls</b>                           | 22                    | 6                             | 12                          | 527                                | 87.8                                                  |
|                                           | 23                    | 6                             | 23                          | 1301                               | 76.5                                                  |
|                                           | 24                    | 7                             | 20                          | 915                                | 70.4                                                  |
|                                           | 25                    | 8                             | 21                          | 1079                               | 83                                                    |
| <b>Average ± Stdev.:</b>                  |                       |                               |                             |                                    | <b>79.4 ± 7.6</b>                                     |

1033



1034 **S3 Table: Parameters values used in the Cellular Potts Model.**

| Parameter                                                                                                                 | Value                                                               |
|---------------------------------------------------------------------------------------------------------------------------|---------------------------------------------------------------------|
| Simulation lattice size                                                                                                   | 400 pixels x 300 pixels                                             |
| Simulation temperature (Noise)                                                                                            | 100                                                                 |
| Total simulation steps                                                                                                    | 130000 Monte Carlo steps (MCS)                                      |
| Moment pull                                                                                                               | 60000 MCS                                                           |
| Pull duration                                                                                                             | 10000 MCS                                                           |
| Epithelial target volume $V_{epi}$                                                                                        | 300 pixel (9% Apical, 70% Lateral and 21% Basal)                    |
| Epithelial volume stiffness $\lambda_{volume-epi}$                                                                        | 100                                                                 |
| Mesenchymal volume $V_{mes}$                                                                                              | 195 pixels                                                          |
| ECM volume stiffness $\lambda_{volume-mes}$                                                                               | 30                                                                  |
| ECM cell volume $V_{ecm}$                                                                                                 | 75 pixels                                                           |
| ECM volume stiffness $\lambda_{volume-ecm}$                                                                               | 25                                                                  |
| Epithelial polarization time                                                                                              | 1500 MCS                                                            |
| Epithelial elongation time                                                                                                | 1500 MCS                                                            |
| Epithelial sub-cellular units spring stiffness                                                                            | 500                                                                 |
| Apical – Lateral spring length                                                                                            | 15 pixels (absolute distance between center of masses of two cells) |
| Apical – Basal spring length                                                                                              | 30 pixels (absolute distance between center of masses of two cells) |
| Lateral – Basal spring length                                                                                             | 20 pixels (absolute distance between center of masses of two cells) |
| Apical – Apical spring stiffness                                                                                          | 100                                                                 |
| Apical – Apical spring length                                                                                             | 4 pixels (absolute distance between center of masses of two cells)  |
| ECM - ECM spring stiffness                                                                                                | 200                                                                 |
| ECM – ECM spring length                                                                                                   | 10 pixels (absolute distance between center of masses of two cells) |
| <b>Contact Energies</b>                                                                                                   |                                                                     |
| <i>Inter-cellular (external) adhesion energies</i>                                                                        |                                                                     |
| $J_{med-apical}, J_{med-lateral}, J_{med-basal}, J_{med-mes}, J_{med-ecm}$                                                | 300, 300, 300, 300, 30                                              |
| $J_{apical-apical}, J_{apical-lateral}, J_{apical-basal}, J_{apical-mes}, J_{apical-ecm}$                                 | 3, 150, 150, 10, 160                                                |
| $J_{lateral-lateral}, J_{lateral-basal}, J_{lateral-mes}, J_{lateral-ecm}, J_{basal-basal}, J_{basal-mes}, J_{basal-ecm}$ | 70, 100, 200, 130, 30, 280, 40                                      |
| <i>Internal adhesion energies (between domains)</i>                                                                       |                                                                     |
| $J_{apical-lateral}, J_{apical-basal}, J_{lateral-basal}$                                                                 | 2, 20, 2                                                            |

1035 **Movie S1: Control embryo**

1036 Time-lapse movie of the development of a control chick embryo (stage HH9+), cultured ex  
1037 ovo, mounted in submerged filter paper sandwiches in the stretch setup for 19 hours, without  
1038 stretching. Timer is in hours.

1039

1040 **Movie S2: Stretched embryo showing somite divisions**

1041 Time-lapse movie of the development of an experimental chick embryo (stage HH10),  
1042 cultured ex ovo, mounted in submerged filter paper sandwiches in the stretch setup for 17,5  
1043 hours, and stretched at a speed of 1.2  $\mu\text{m/s}$  along the anterior-posterior (AP) axis, in two pulls.  
1044 First the overview is shown, afterwards a zoom in at the mesoderm. The stretching deforms  
1045 the embryos slowly but substantially, while development progresses without damage. During  
1046 the deformation, somites divide into daughter somites of different sizes, as marked by the  
1047 white arrowheads in the zoom. For example: the first arrowhead shows an asymmetric somite  
1048 division (lower left), while the second arrowhead shows a symmetric division (upper left).

1049

1050 **Movie S3: Somite epithelialization and division *in silico***

1051 Simulation video of dividing *in silico* somites, consisting out of frames of every 500<sup>th</sup> Monte  
1052 Carlo Step. We tested different rules in our Cellular Potts model concerning cellular behavior  
1053 in the deformed somites, to find out the most likely mechanism for the somite division to take  
1054 place. Daughter somite formation in stretched somites could only successfully be induced  
1055 when a MET of mesenchymal core cells upon contact to the basal or lateral membranes of  
1056 epithelial cells was allowed.
